# Supplementary material for: Antifungal potential of secondary metabolites involved in the interaction between citrus pathogens
Source: PubMed Central journal article supplement (PMC6901458; doi:10.1038/s41598-019-55204-9), 2019-12-09
Supplement: 41598_2019_55204_MOESM1_ESM.pdf [file 41598_2019_55204_MOESM1_ESM.pdf]

## SCIENTIFIC REPORTS

### **Antifungal potential of secondary metabolites involved in the interaction between citrus pathogens**

Jonas Henrique Costa<sup>1</sup>, Cristiane Izumi Wassano<sup>1</sup>, Célio Fernando Figueiredo Angolini<sup>2</sup>, Kirstin Scherlach<sup>3</sup>, Christian Hertweck<sup>3,4</sup>, Taícia Pacheco Fill<sup>1\*</sup>

<sup>1</sup> Institute of Chemistry, University of Campinas, CP 6154, 13083-970, Campinas – SP, Brazil

<sup>2</sup> Center for Natural and Human Sciences, Federal University of ABC, 09210-580, Santo André – SP, Brazil

<sup>3</sup> Department of Biomolecular Chemistry, Leibniz Institute for Natural Product Research and Infection Biology – Hans Knöll Institute, Jena, Germany

<sup>4</sup> Chair of Natural Product Chemistry, Friedrich Schiller University Jena, 07743 Jena, Germany.

\*Corresponding author: phone +55-19-35213092, e-mail [taicia@unicamp.br](mailto:taicia@unicamp.br)

## Supplementary Information

### S1. Mass Spectrometry Imaging (MSI)

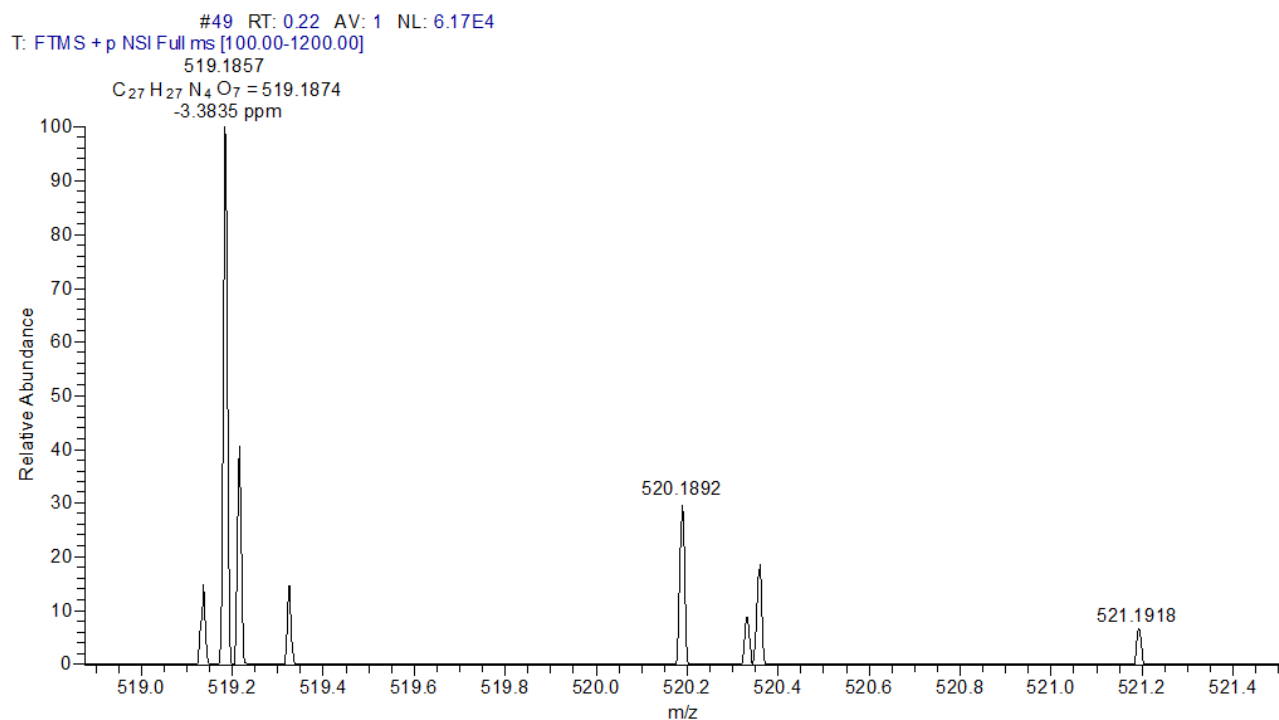

**Figure S1.** DESI-MS (+) signals obtained for tryptuoqualanine A (**1**) on the surface of the *P. digitatum* and *P. citrinum* co-culture.

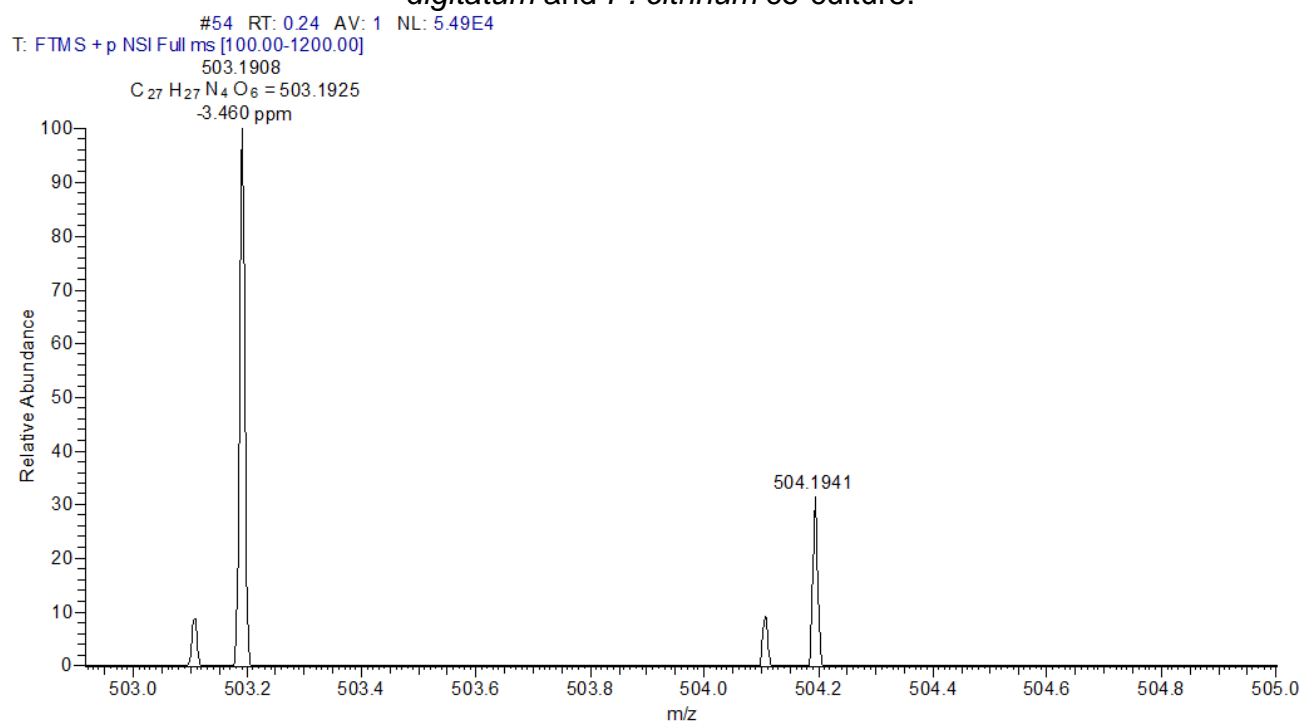

**Figure S2.** DESI-MS (+) signals obtained for tryptuoqualanine C (**2**) on the surface of the *P. digitatum* and *P. citrinum* co-culture.

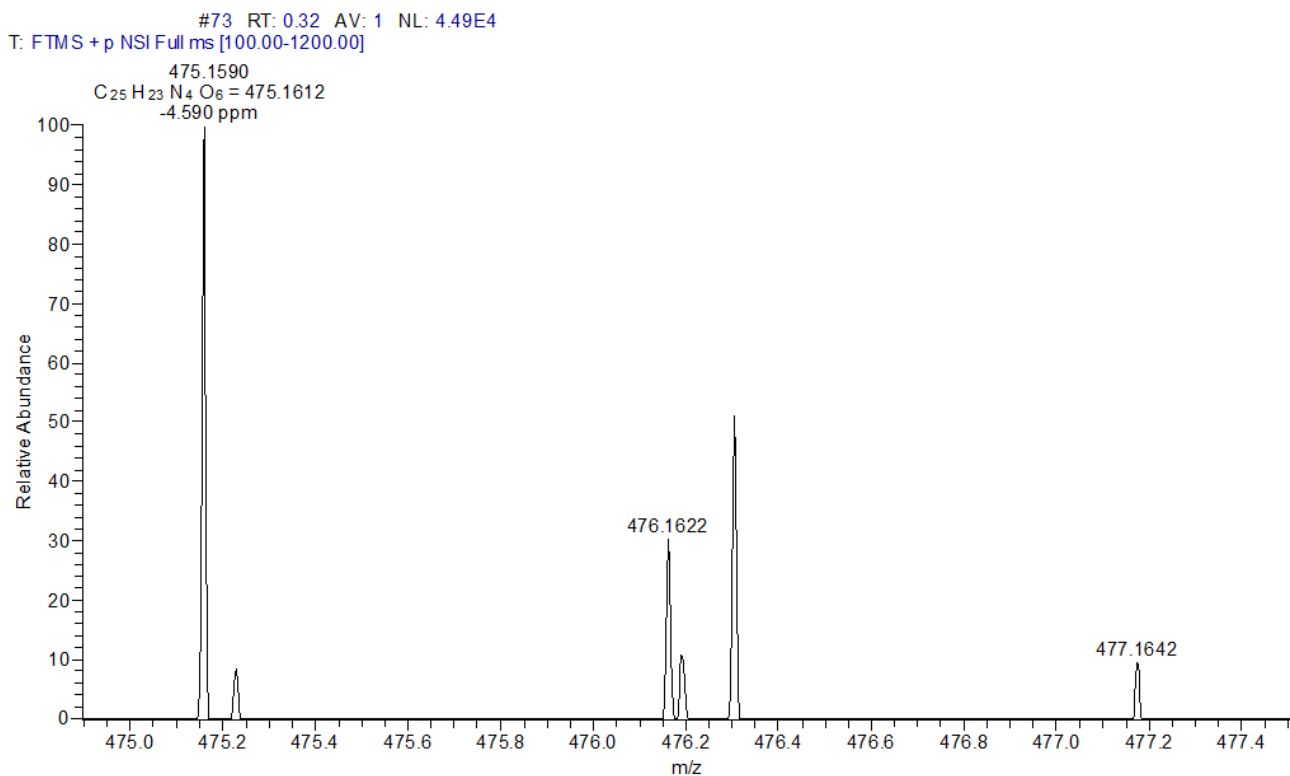

**Figure S3.** DESI-MS (+) signals obtained for tryptoquialanone (**3**) on the surface of the *P. digitatum* and *P. citrinum* co-culture.

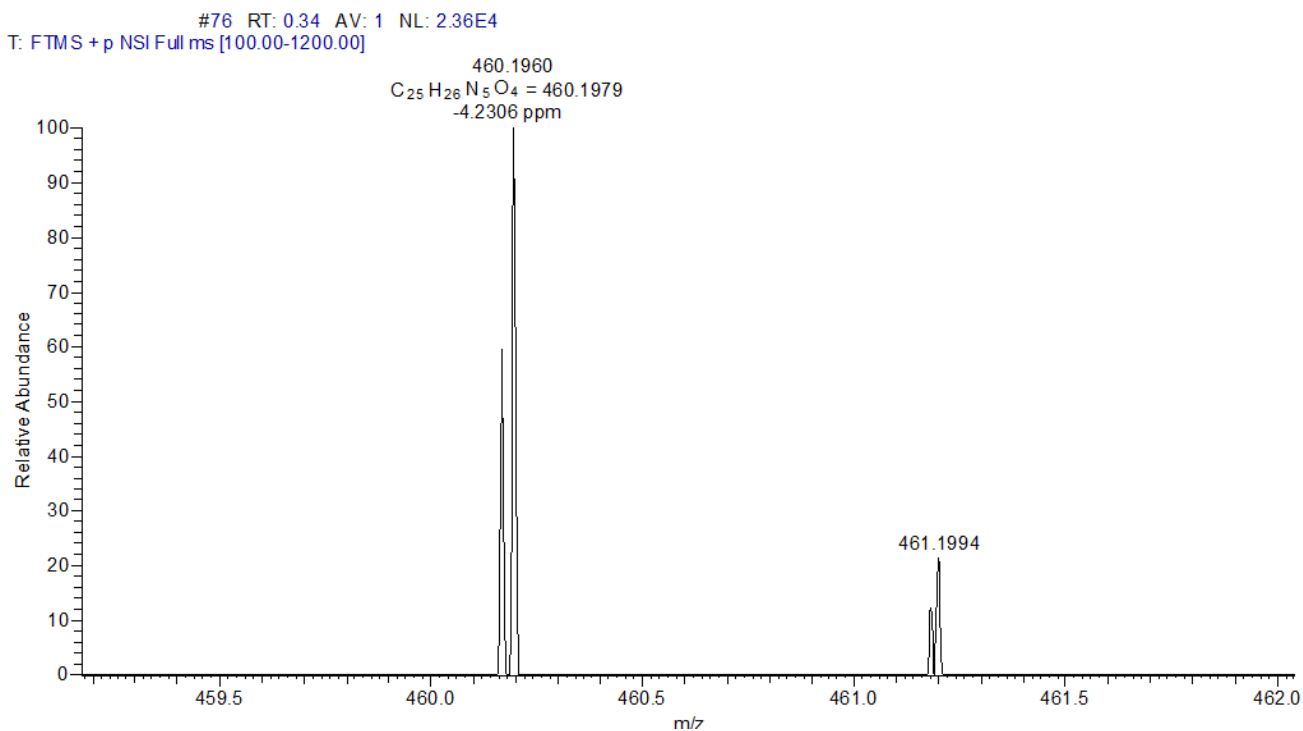

**Figure S4.** DESI-MS (+) signals obtained for 15-dimethyl-2-epi-fumiquinazoline A (**4**) on the surface of the *P. digitatum* and *P. citrinum* co-culture.

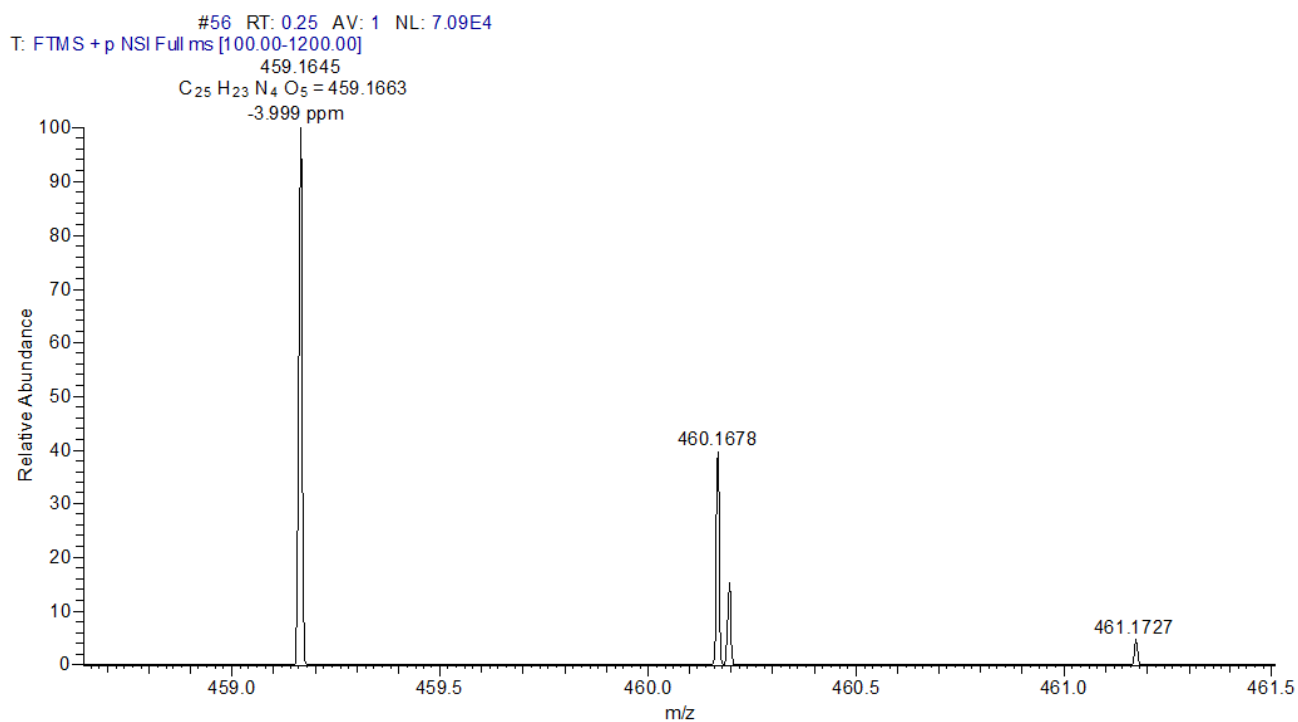

**Figure S5.** DESI-MS (+) signals obtained for deoxytryptoquialanone (**5**) on the surface of the *P. digitatum* and *P. citrinum* co-culture.

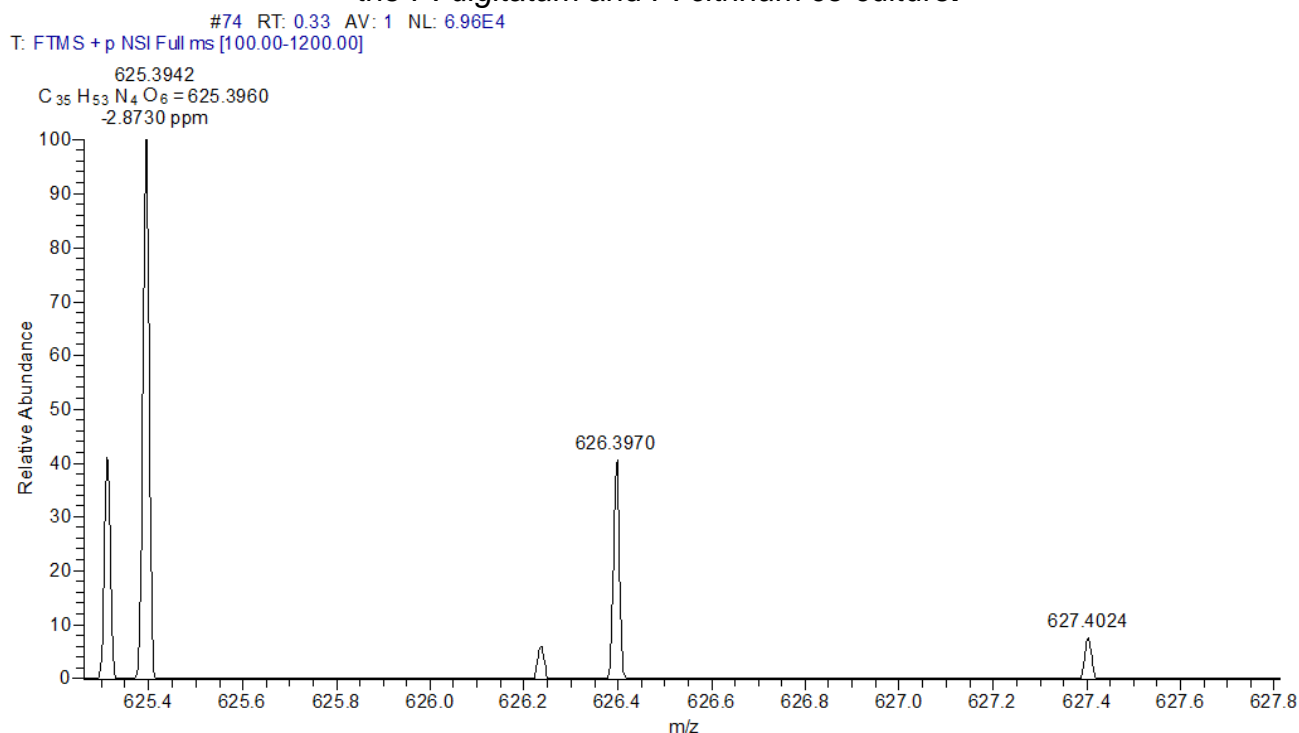

**Figure S6.** DESI-MS (+) signals obtained for citrinadin A (**6**) on the surface of the *P. digitatum* and *P. citrinum* co-culture.

#66 RT: 0.29 AV: 1 NL: 2.31E4  
T: FTMS + p NSI Full ms [100.00-1200.00]

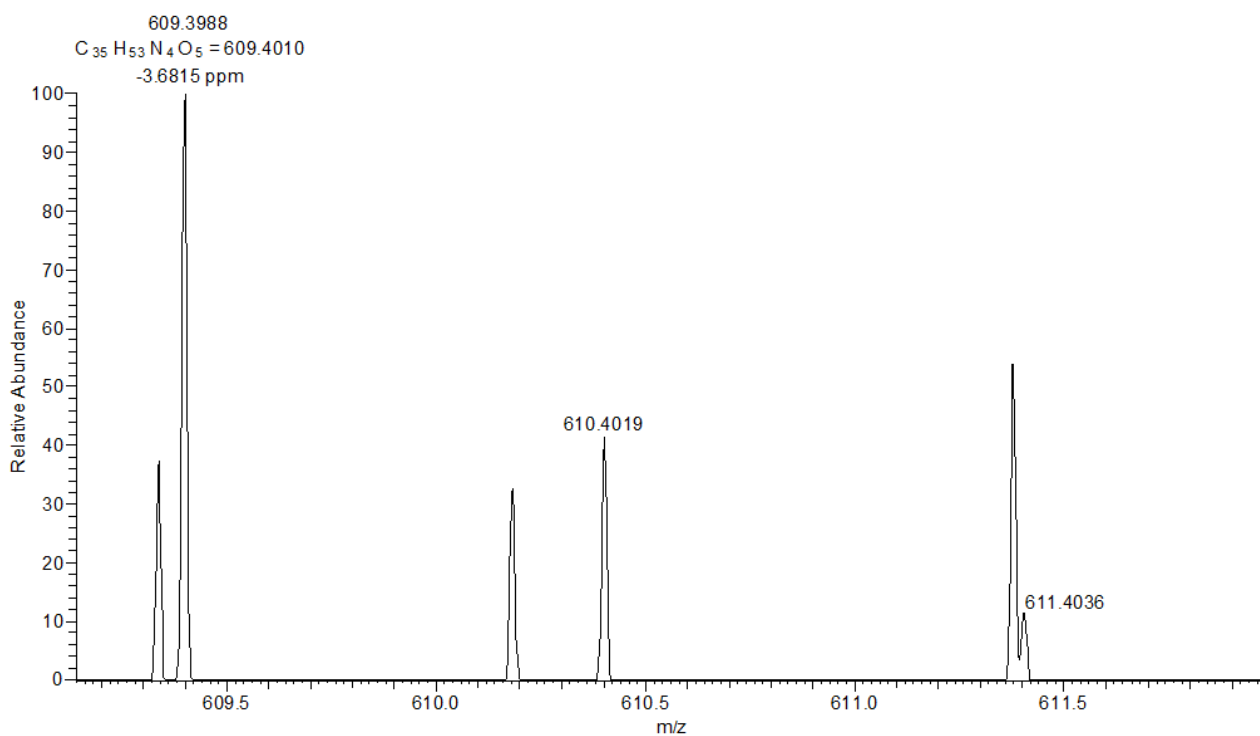

**Figure S7.** DESI-MS (+) signals obtained for deoxycitrinadin A (**7**) on the surface of the *P. digitatum* and *P. citrinum* co-culture.

#71 RT: 0.31 AV: 1 NL: 5.96E5  
T: FTMS + p NSI Full ms [100.00-1200.00]

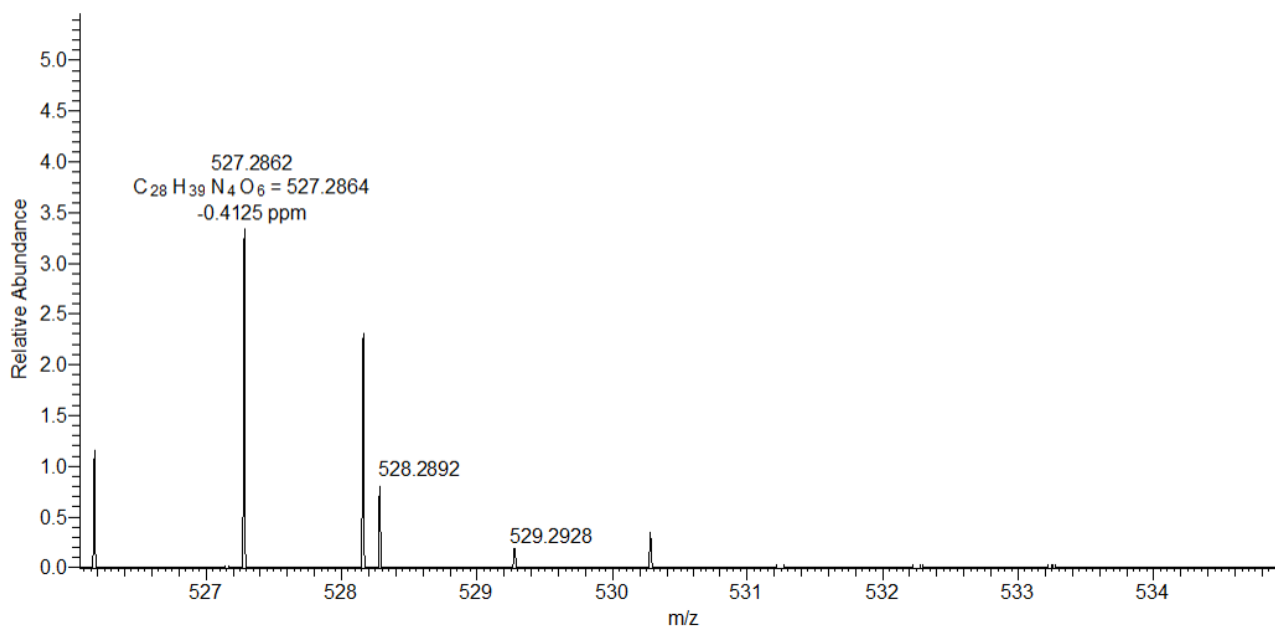

**Figure S8.** DESI-MS (+) signals obtained for Phe-Val-Val-Tyr (**8**) on the surface of the *P. digitatum* and *P. citrinum* co-culture.

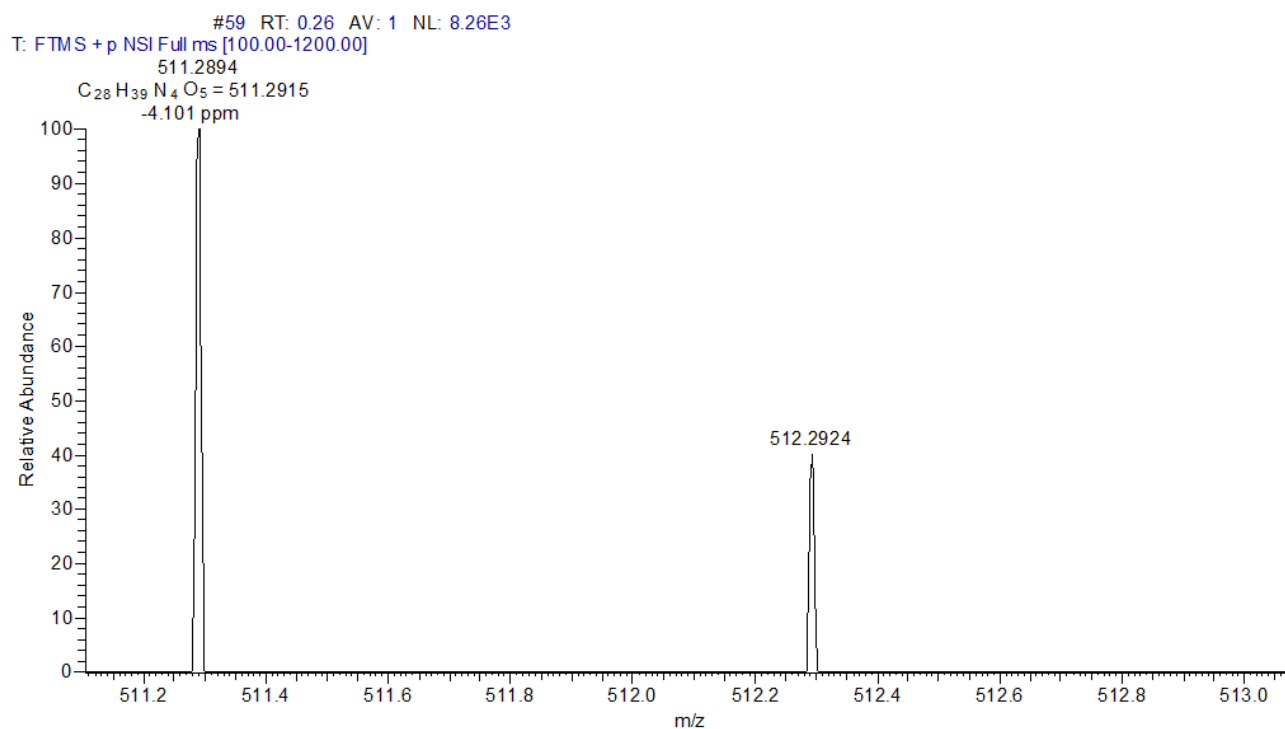

**Figure S9.** DESI-MS (+) signals obtained for Phe-Val-Val-Phe (**9**) on the surface of the *P. digitatum* and *P. citrinum* co-culture.

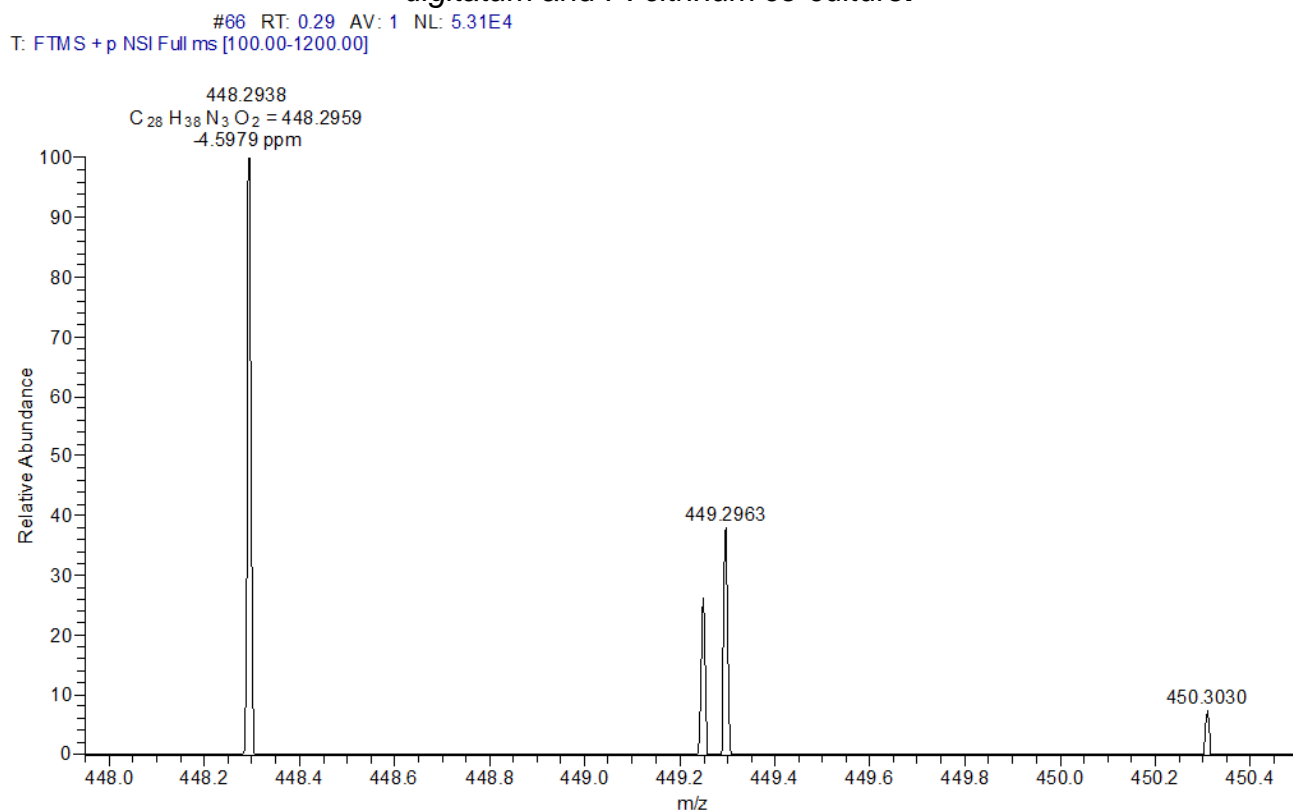

**Figure S10.** DESI-MS (+) signals obtained for chrysogenamide A (**10**) on the surface of the *P. digitatum* and *P. citrinum* co-culture.

## S2. Mass Spectrometry of *in vivo* co-culture

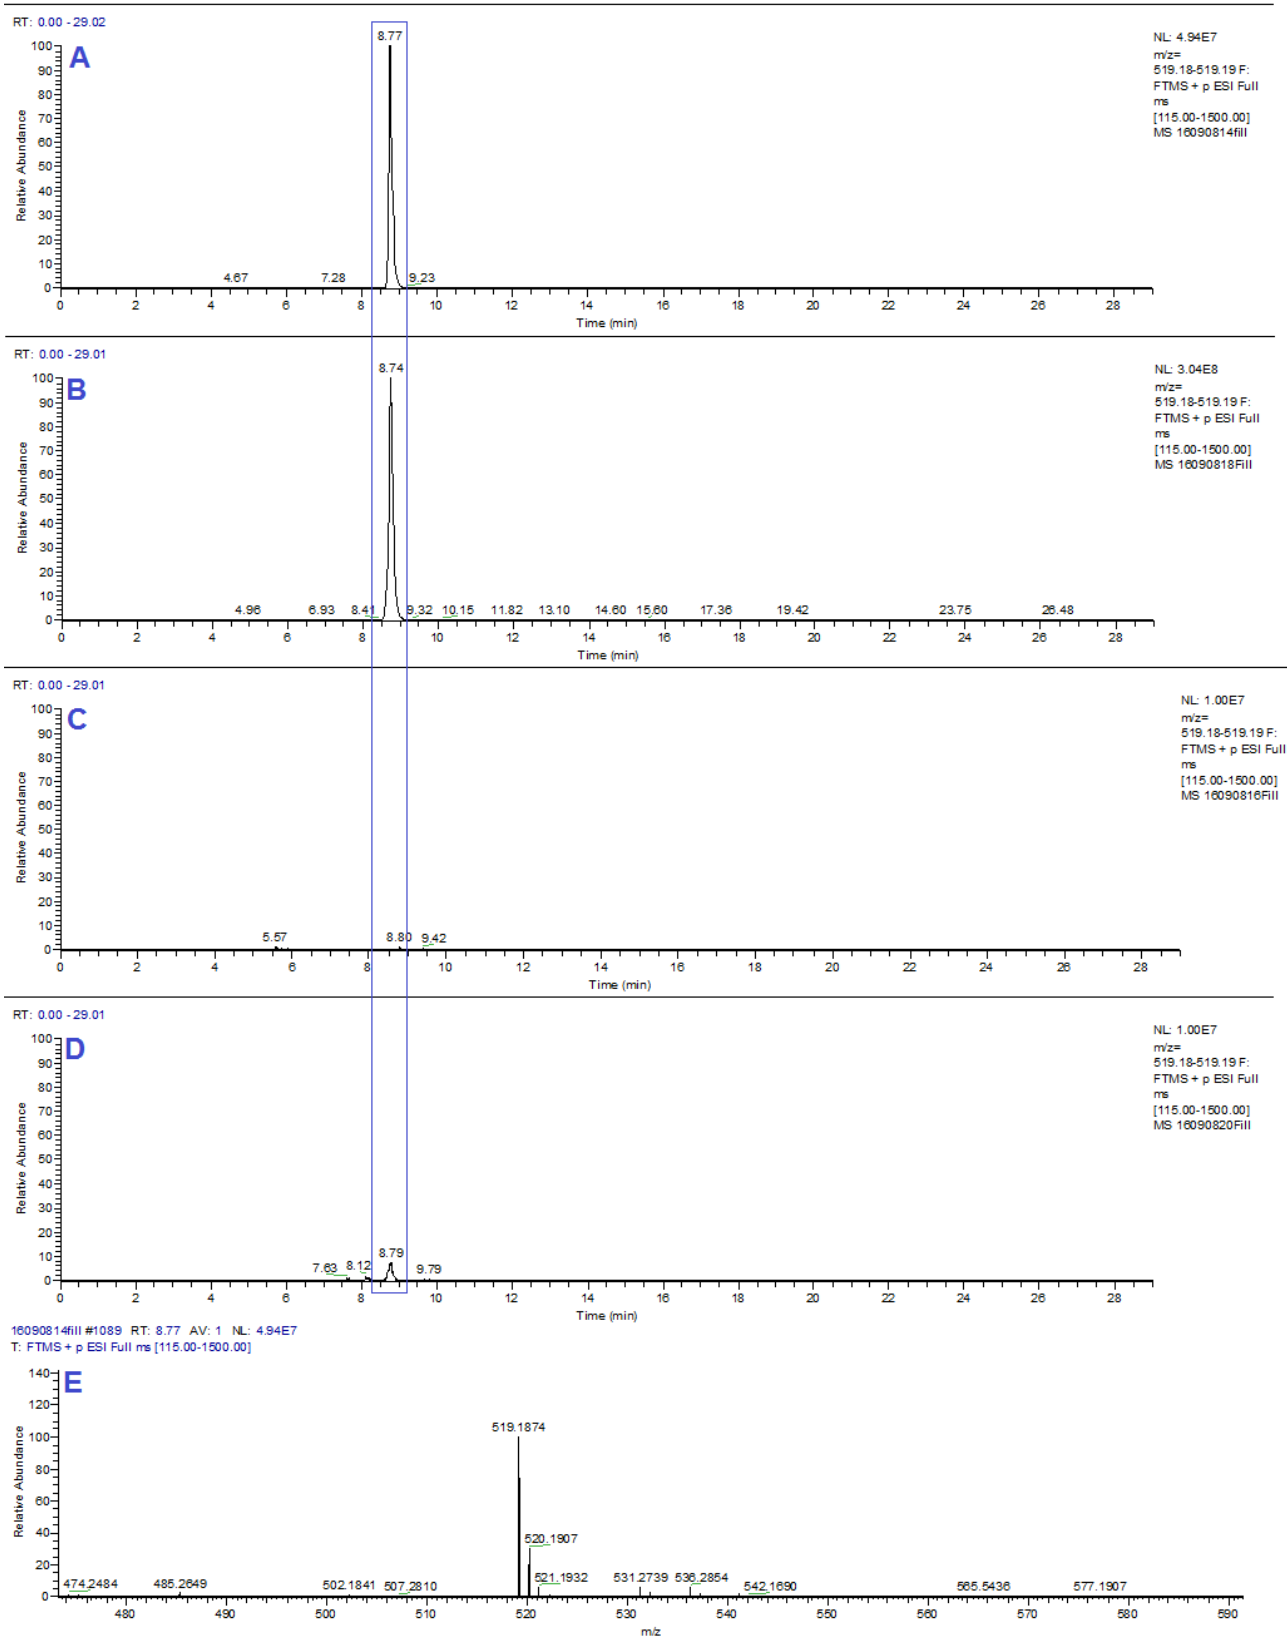

**Figure S11.** Extracted ion chromatograms of  $[M+H]^+$   $m/z$  519.18, tryptoquialanine A (**1**), for *in vivo* extracts of (A) co-culture, (B) *P. digitatum*, (C) *P. citrinum* and in (D) orange control. (E) Mass spectrum of **1**.

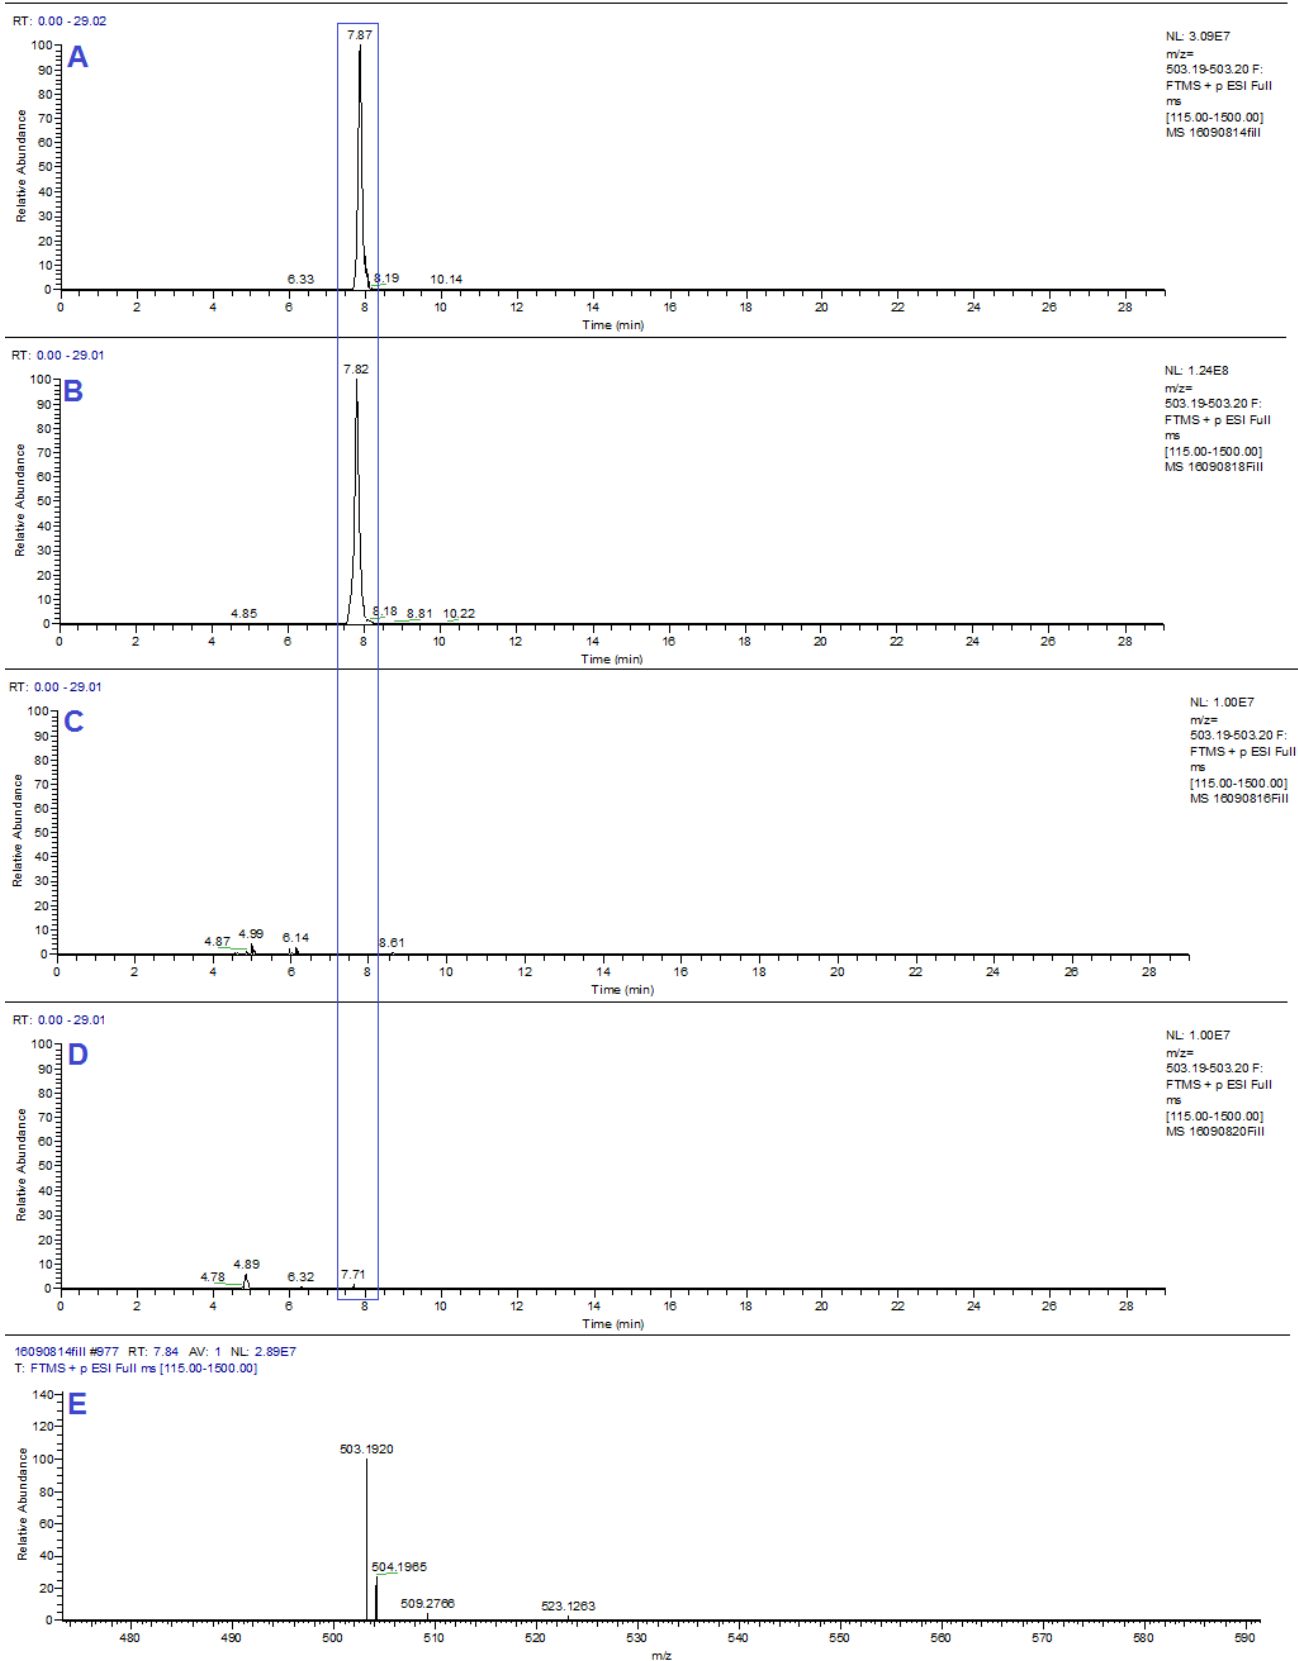

**Figure S12.** Extracted ion chromatograms of  $[M+H]^+$   $m/z$  503.19, tryptuqualanine C (2), for *in vivo* extracts of (A) co-culture, (B) *P. digitatum*, (C) *P. citrinum* and in (D) orange control. (E) Mass spectrum of 2.



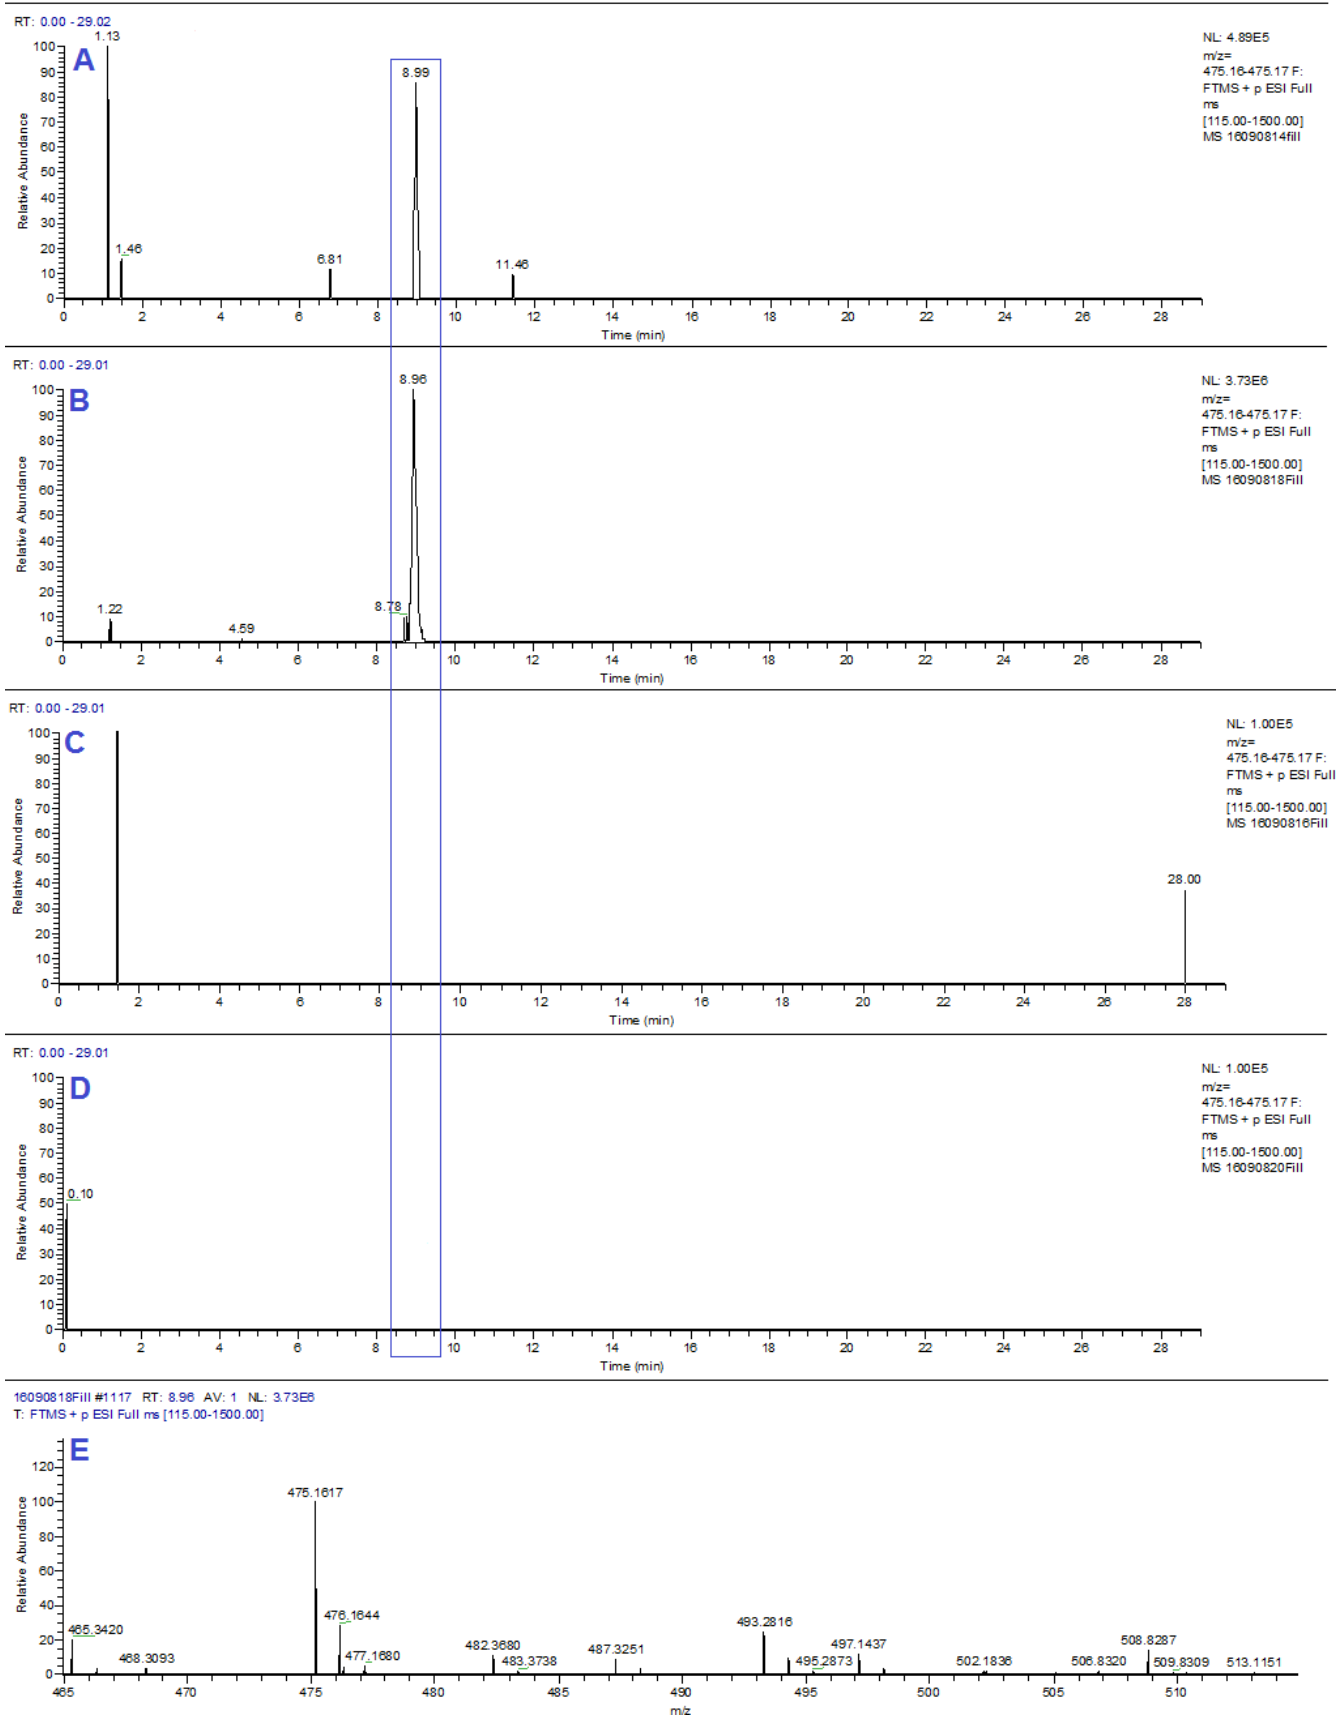

**Figure S13.** Extracted ion chromatograms of [M+H]<sup>+</sup> *m/z* 475.16, tryptoquialanone (**3**), for *in vivo* extracts of (A) co-culture, (B) *P. digitatum*, (C) *P. citrinum* and in (D) orange control. (E) Mass spectrum of **3**.

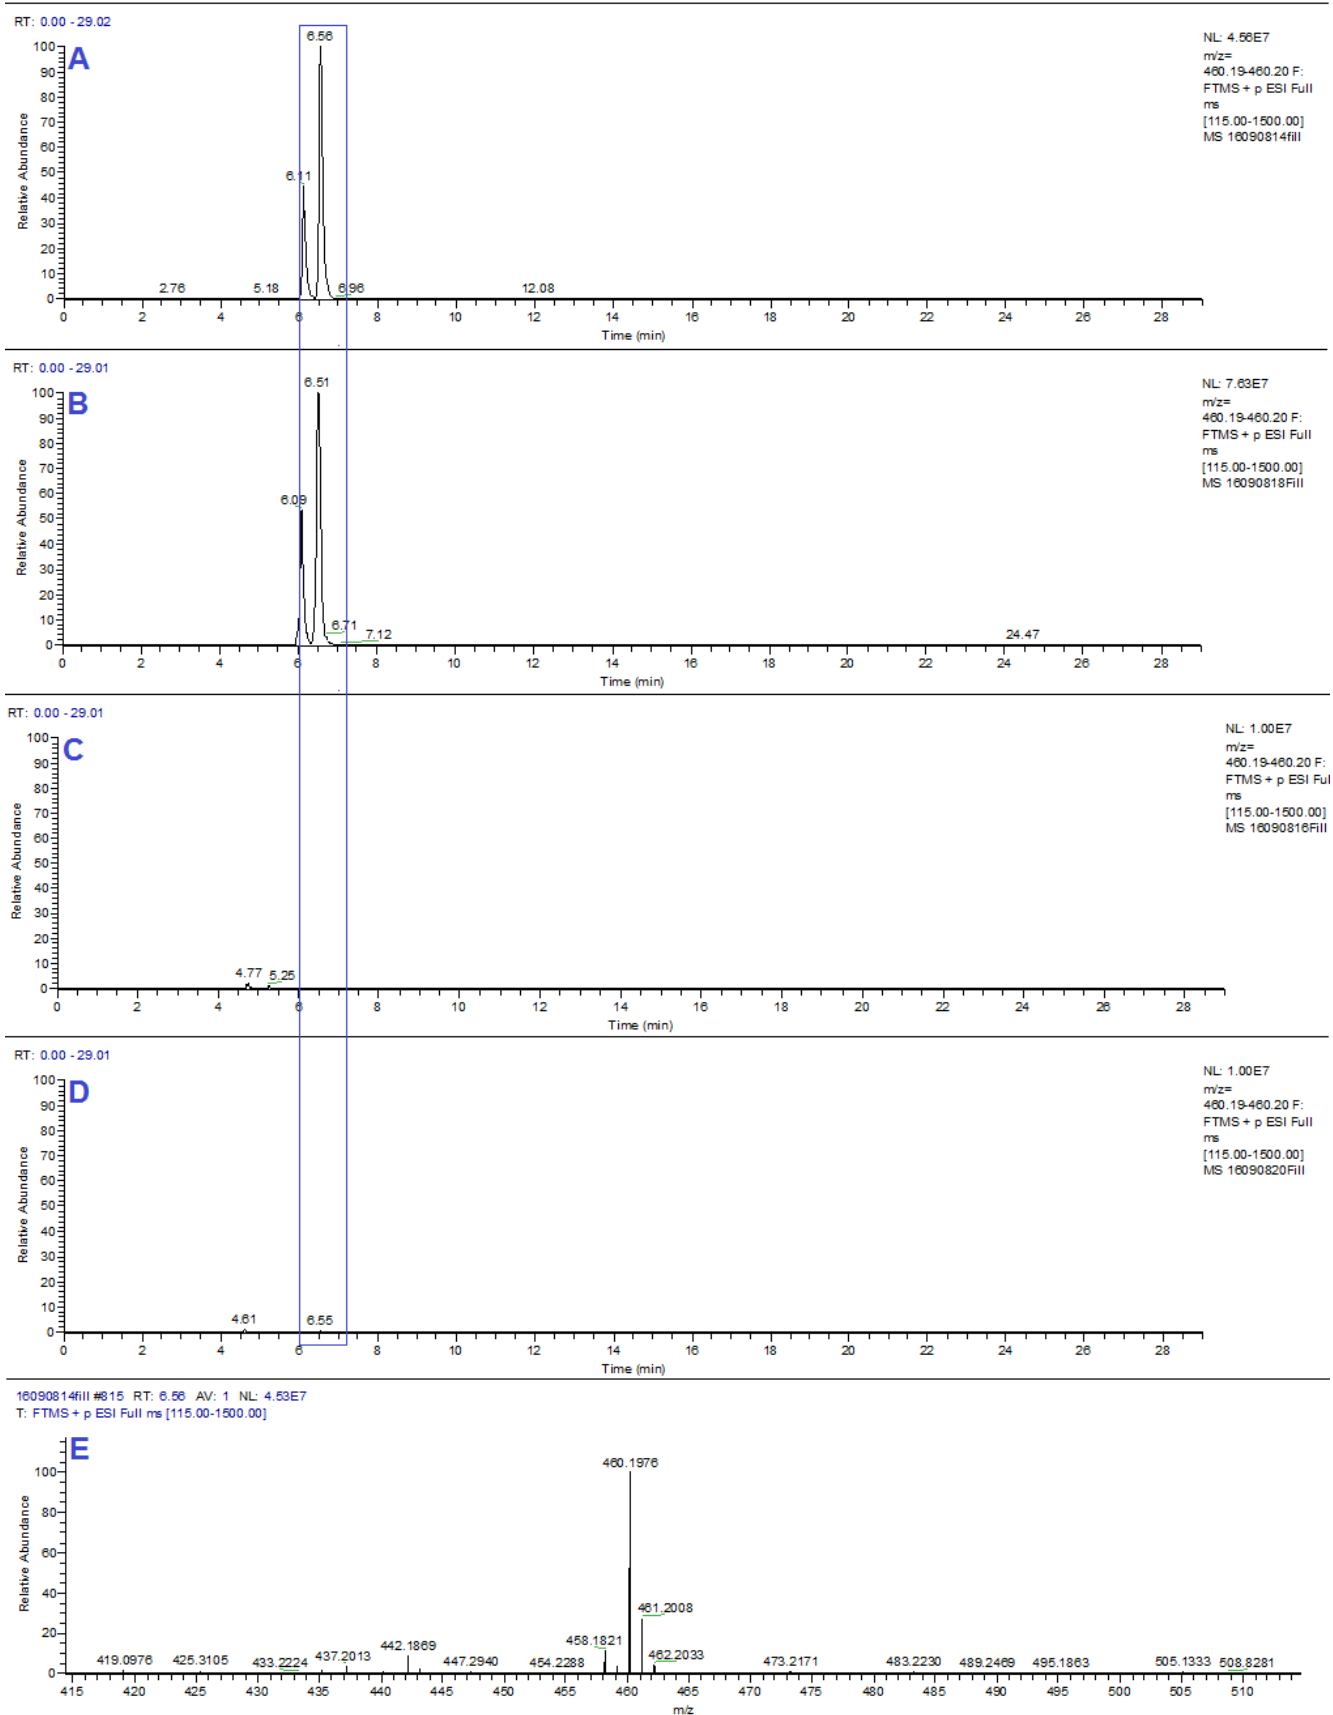

**Figure S14.** Extracted ion chromatograms of  $[M+H]^+$   $m/z$  460.19, 15-dimethyl-2-epi-fumiquinazoline A (**4**), for *in vivo* extracts of (A) co-culture, (B) *P. digitatum*, (C) *P. citrinum* and in (D) orange control. (E) Mass spectrum of **4**.

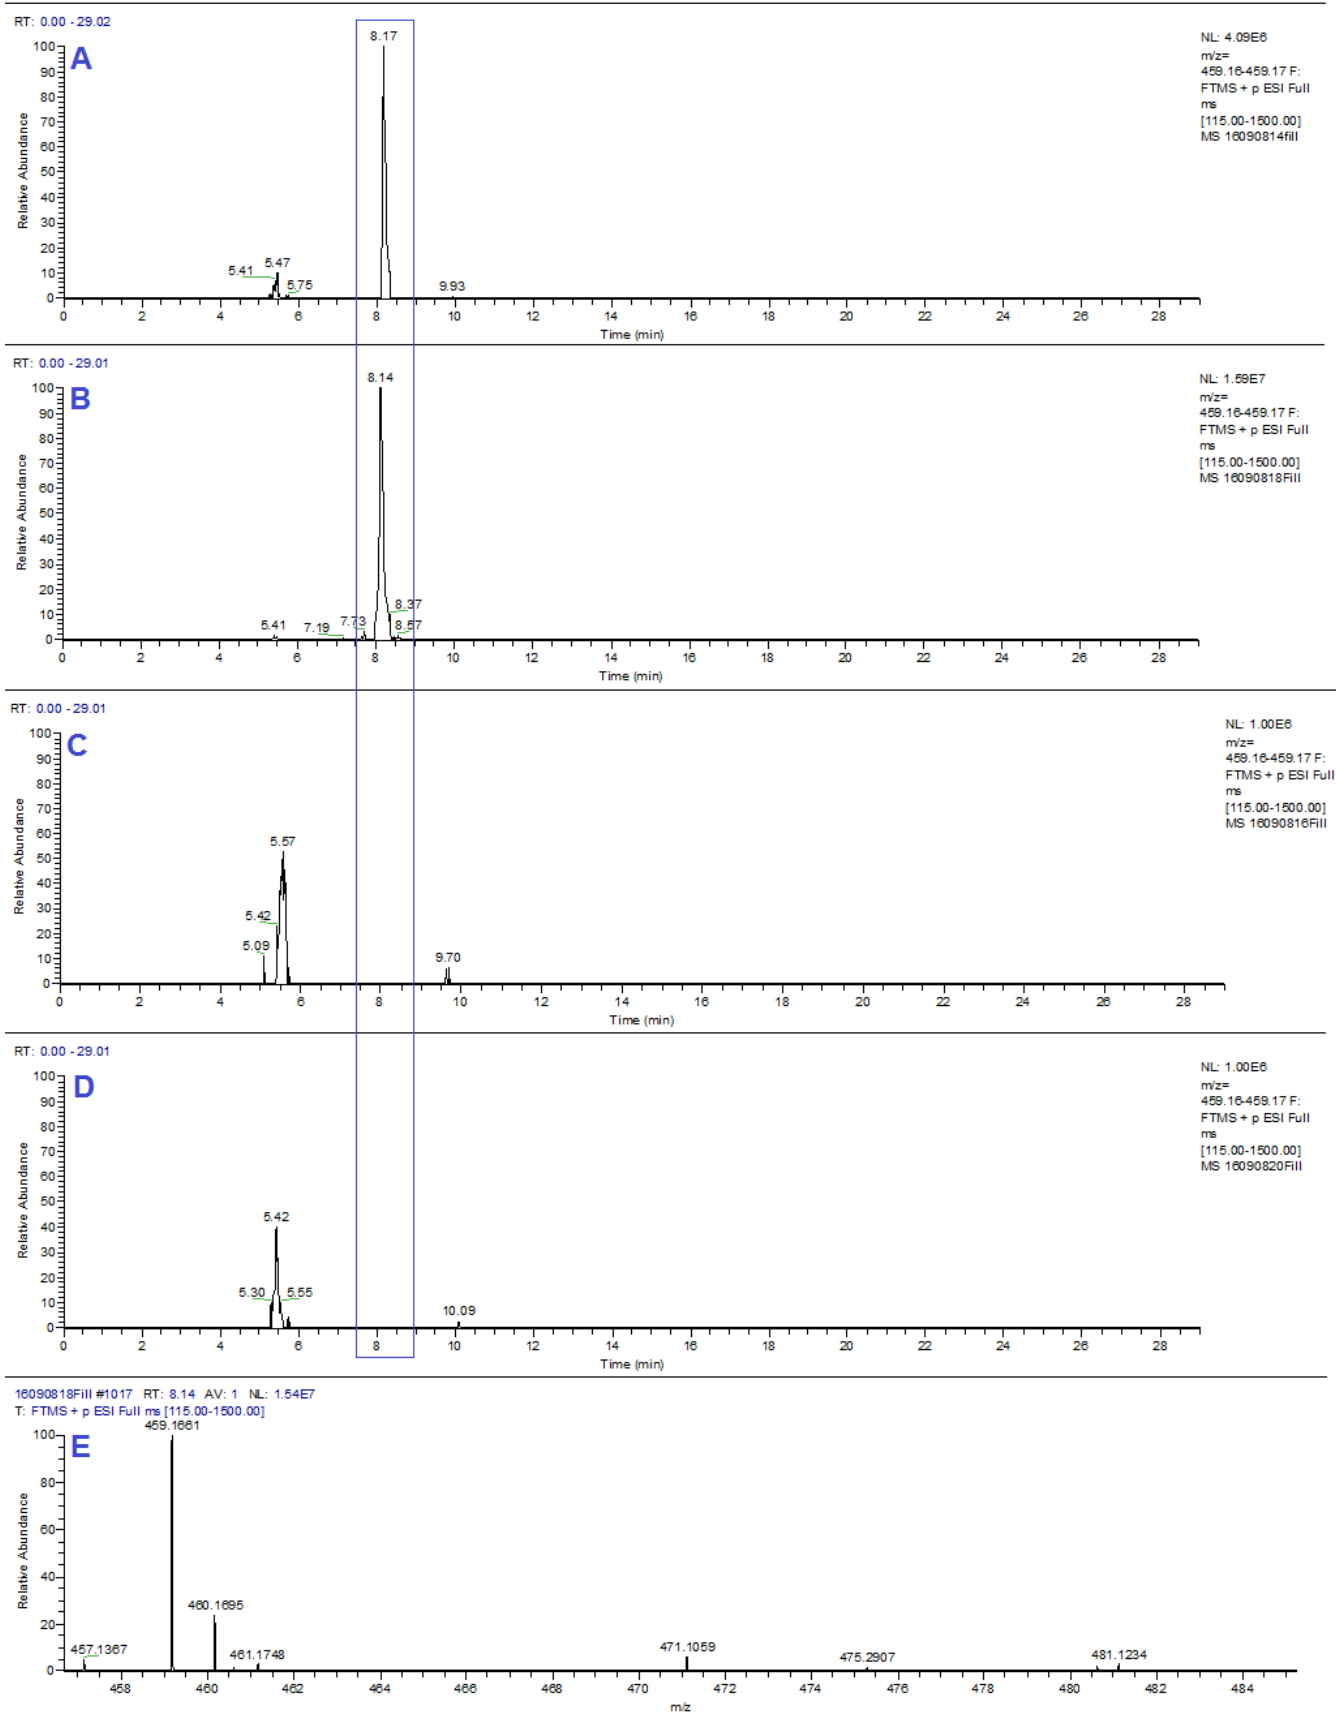

**Figure S15.** Extracted ion chromatograms of  $[M+H]^+$   $m/z$  459.16, deoxytryptoquialanone (5), for *in vivo* extracts of (A) co-culture, (B) *P. digitatum*, (C) *P. citrinum* and in (D) orange control. (E) Mass spectrum of 5.

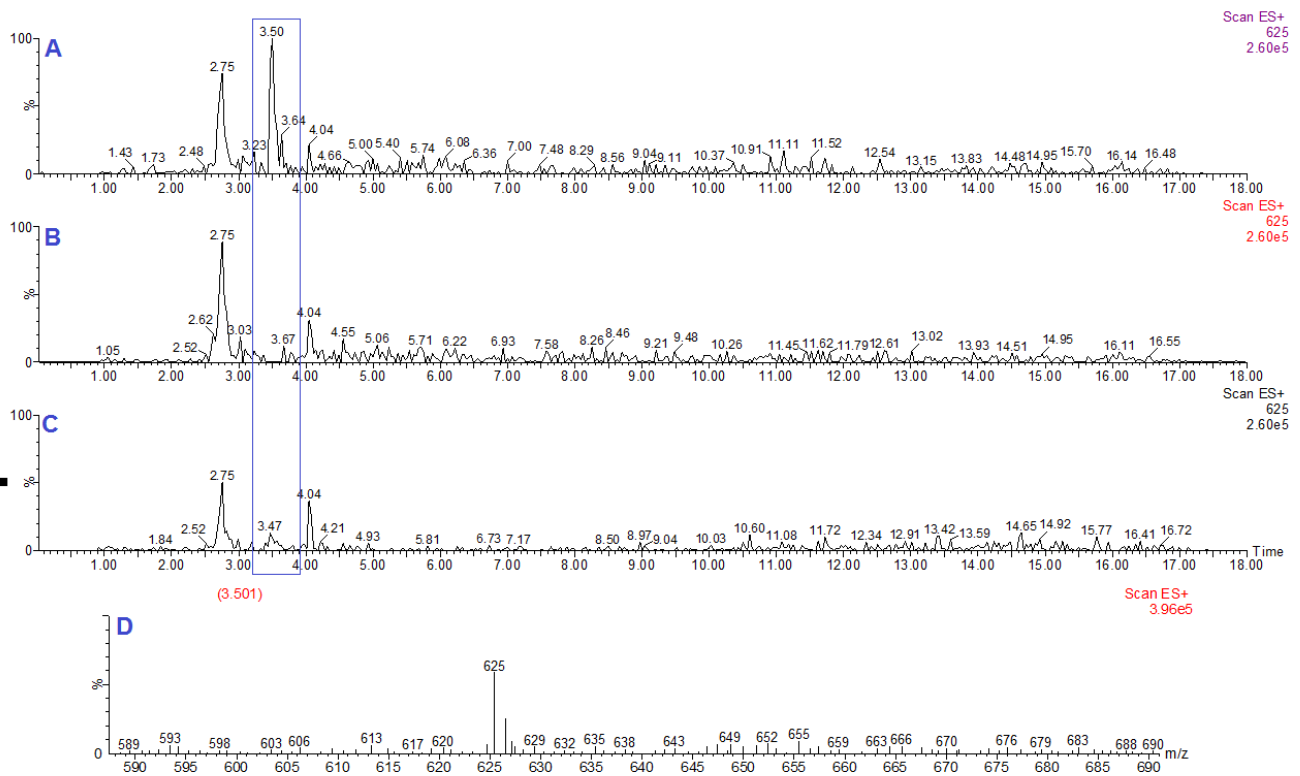

**Figure S16.** Extracted ion chromatograms of  $[M+H]^+$   $m/z$  625, citrinadin A (**6**), for *in vivo* extracts of (A) co-culture and (B) *P. citrinum* and in (C) orange control. (D) Mass spectrum of **6**.

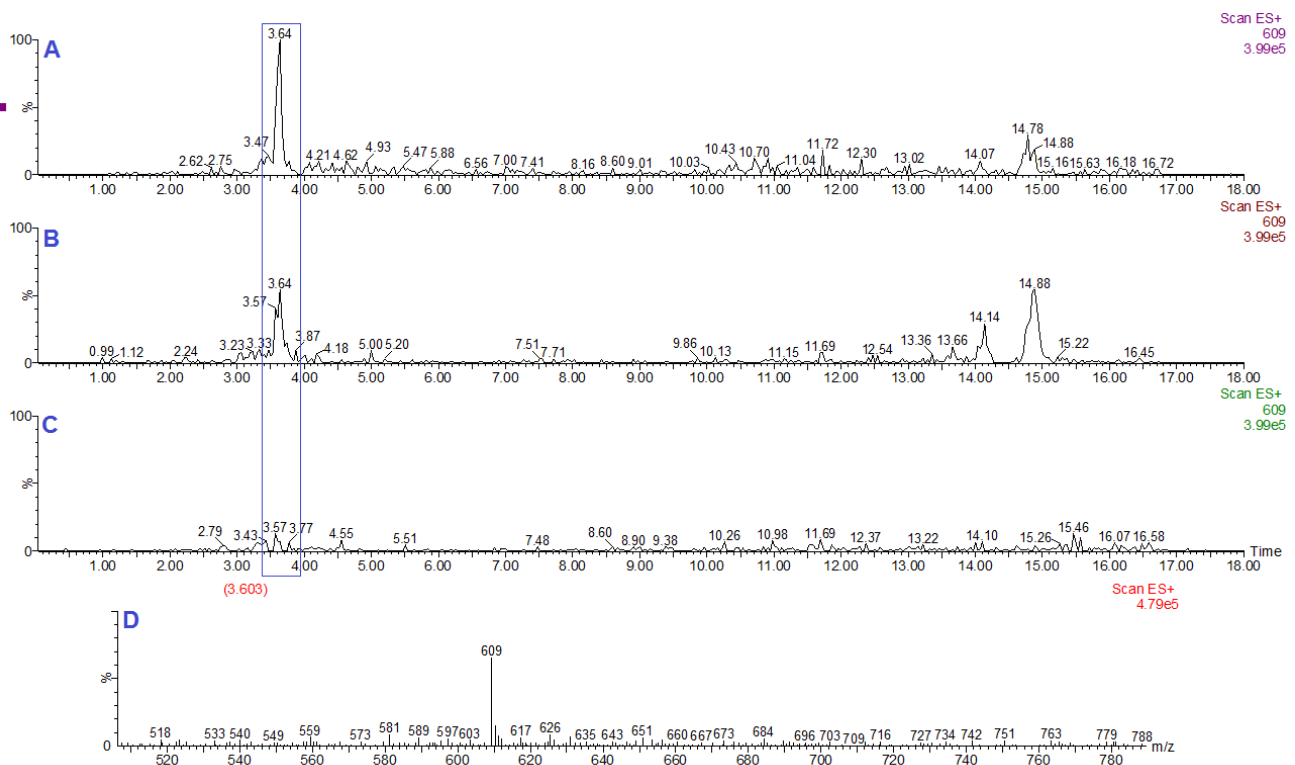

**Figure S17.** Extracted ion chromatograms of  $[M+H]^+$   $m/z$  609, deoxycitrinadin A (**7**), for *in vivo* extracts of (A) co-culture and (B) *P. citrinum* and in (C) orange control. (D) Mass spectrum of **7**.

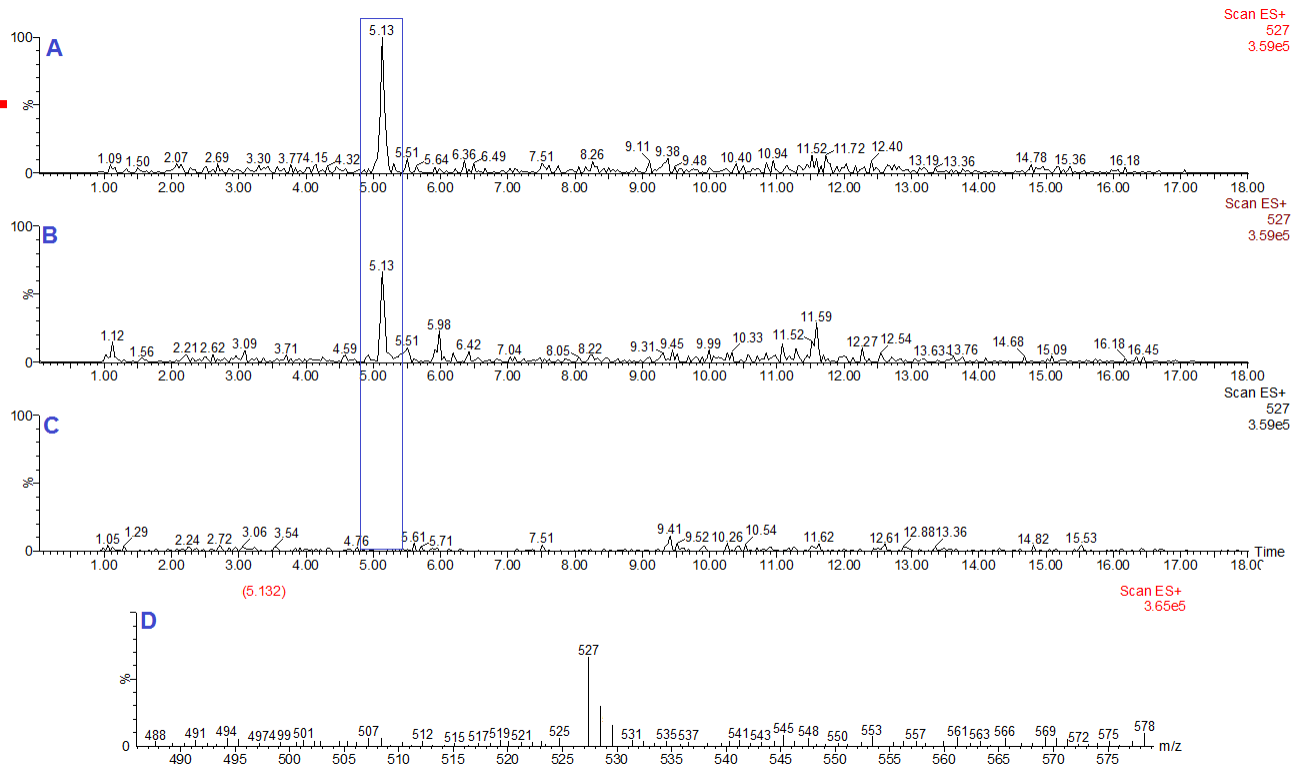

**Figure S18.** Extracted ion chromatograms of  $[M+H]^+$   $m/z$  527, Phe-Val-Val-Tyr (**8**), for *in vivo* extracts of (A) co-culture and (B) *P. citrinum* and in (C) orange control. (D) Mass spectrum of **8**.

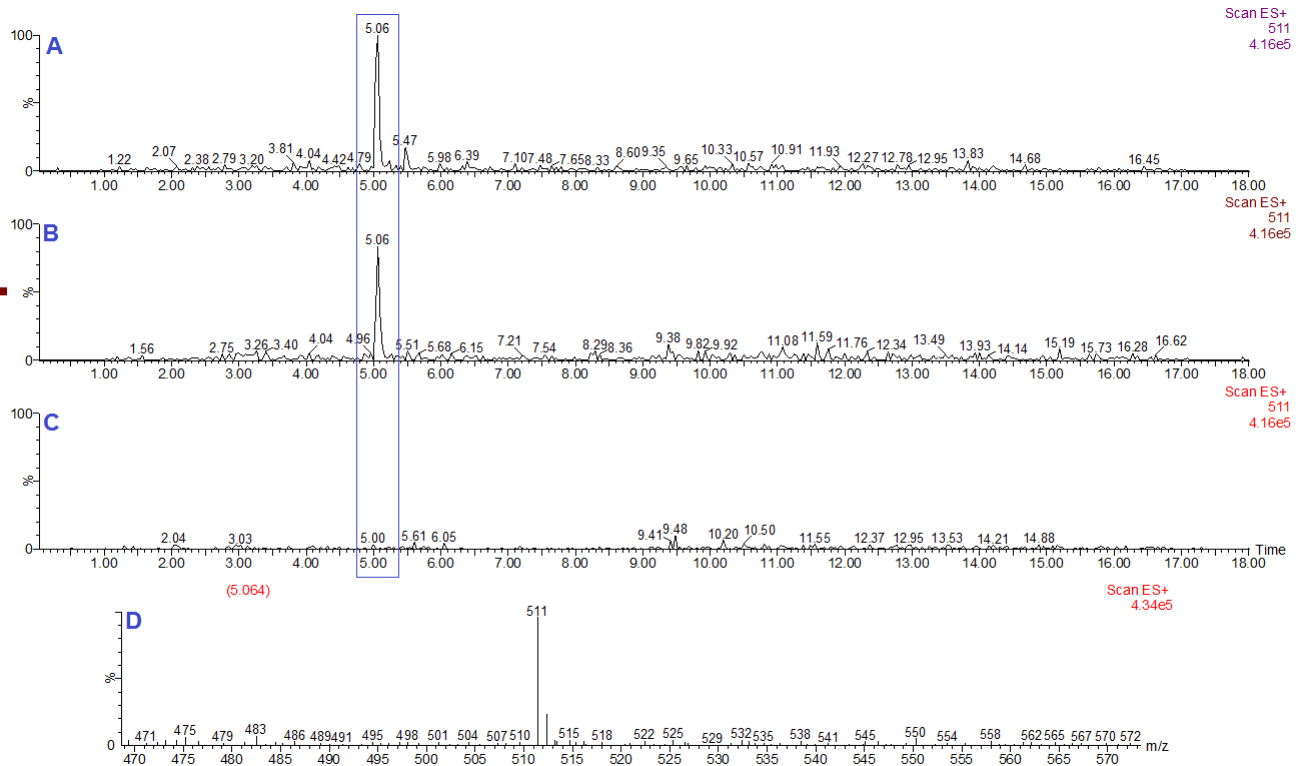

**Figure S19.** Extracted ion chromatograms of  $[M+H]^+$   $m/z$  511, Phe-Val-Val-Phe (**9**), for *in vivo* extracts of (A) co-culture and (B) *P. citrinum* and in (C) orange control. (D) Mass spectrum of **9**.

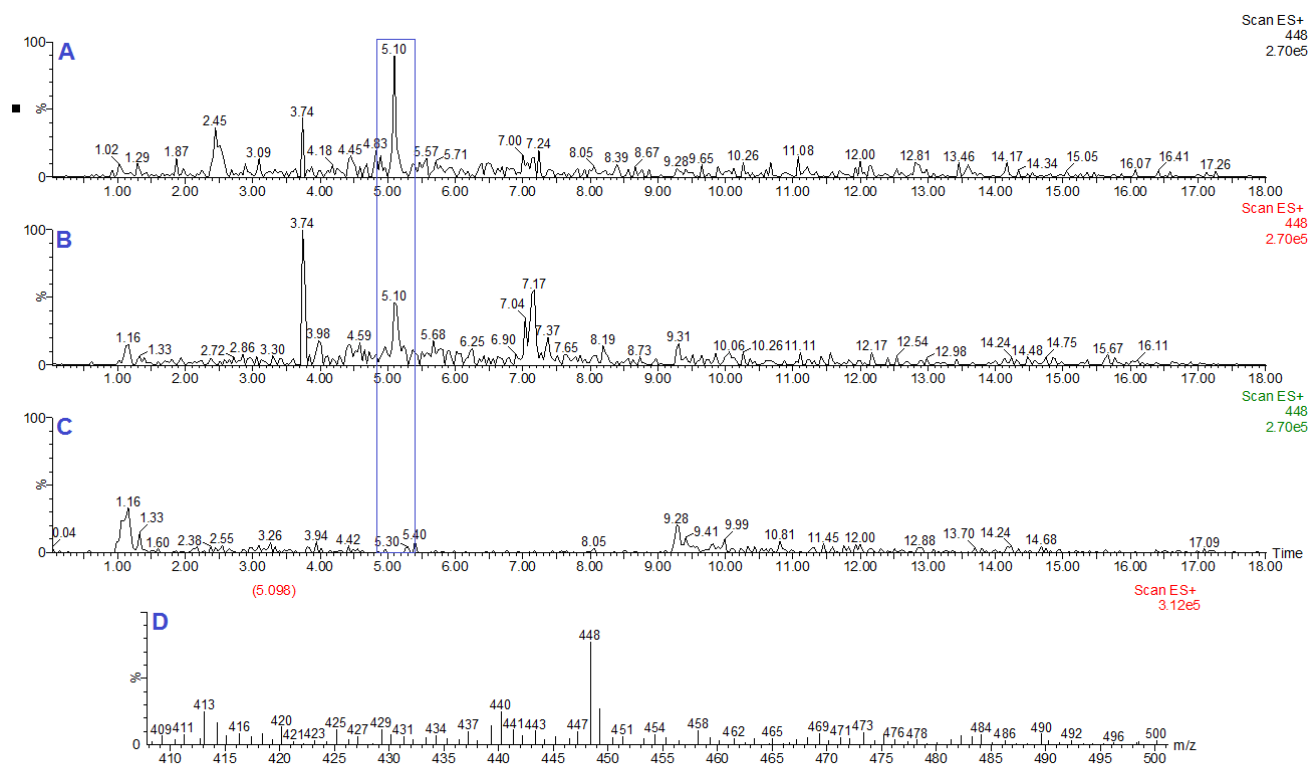

**Figure S20.** Extracted ion chromatograms of  $[M+H]^+$   $m/z$  448, chrysogenamide A (**10**), for *in vivo* extracts of (A) co-culture and (B) *P. citrinum* and in (C) orange control. (D) Mass spectrum of **10**.

### S3. Characterization of secondary metabolites

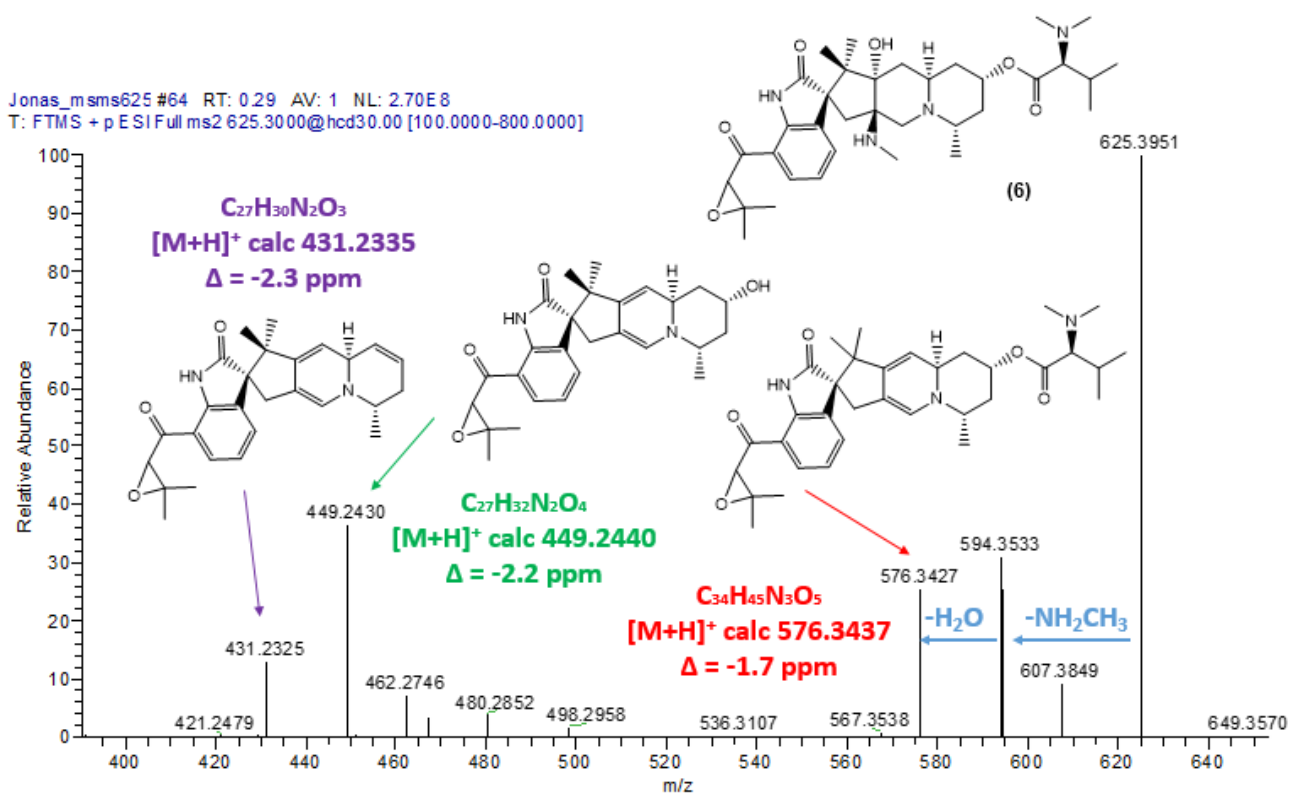

**Figure S21.** MS/MS spectrum of citrinadin A (6) (30 eV).

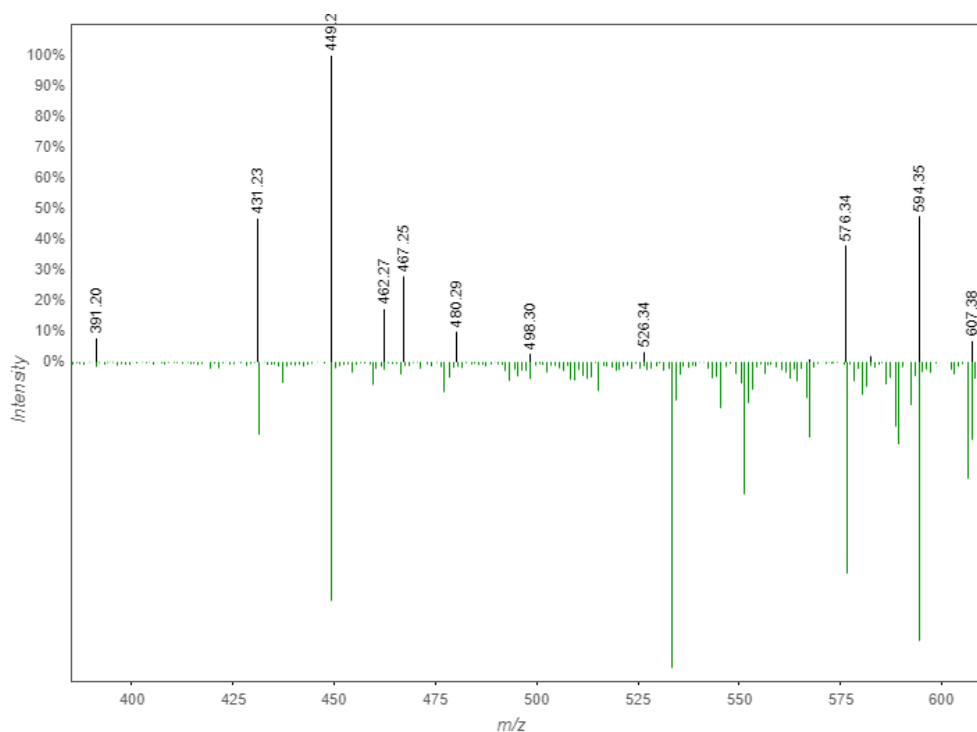

**Figure S22.** MS/MS match between GNPS database (green) and ion at  $m/z$  625 isolated from co-culture extract (black). The tandem mass spectrum shared 5 mass fragments in common ( $m/z$  607.38, 594.35, 576.34, 449.24 and 431.23), suggesting that ion at  $m/z$  625 could be citrinadin A.

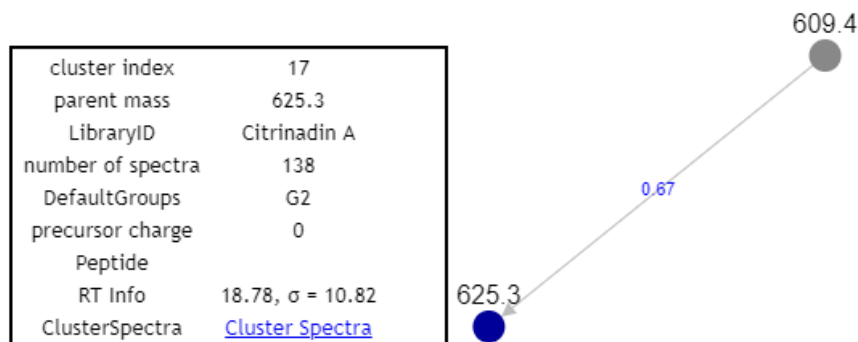

**Figure S23.** MS/MS molecular networking analysis of compounds isolated from *P. citrinum* and *P. digitatum* co-culture extract. The blue node represents a match between  $m/z$  625 and citrinadin A in GNPS database. The grey ( $m/z$  609) and blue node are related metabolites grouped in same cluster with a cosine of 0.67.

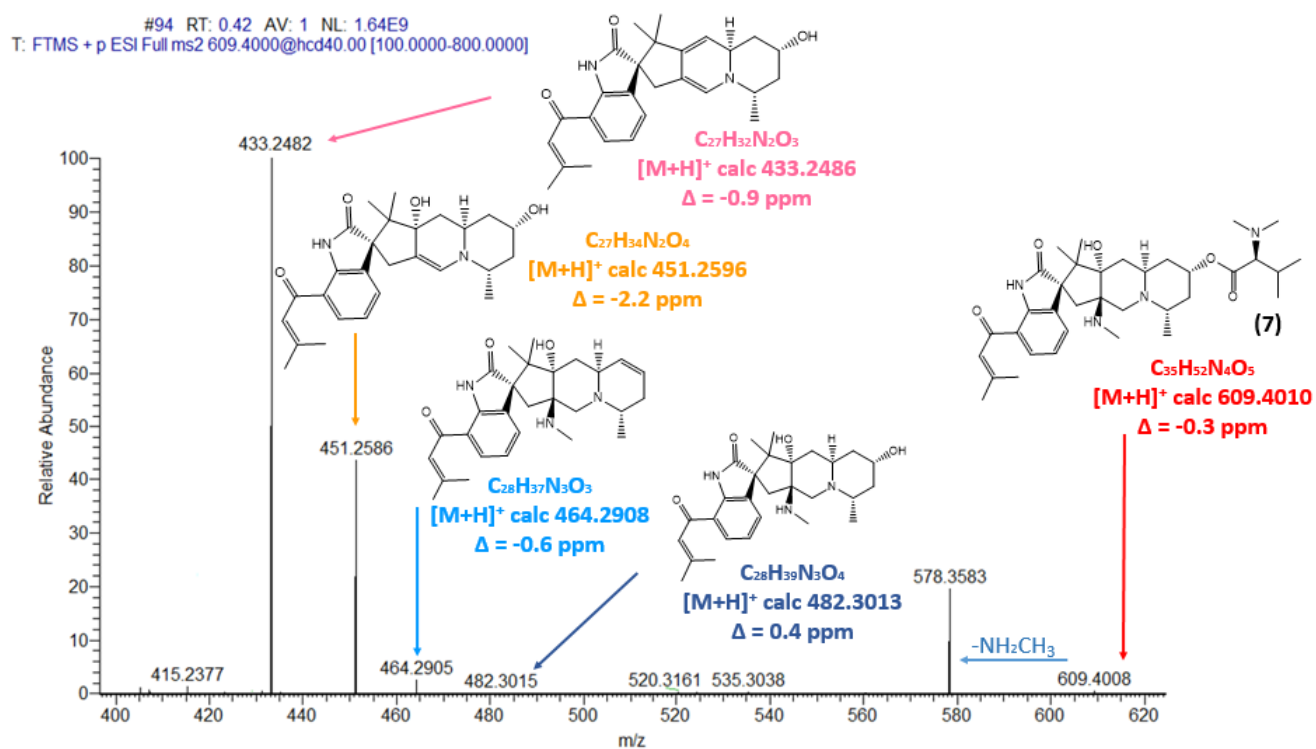

**Figure S24.** MS/MS spectrum of deoxycitrinadin A (**7**) (40 eV) and proposed fragmentation structures.



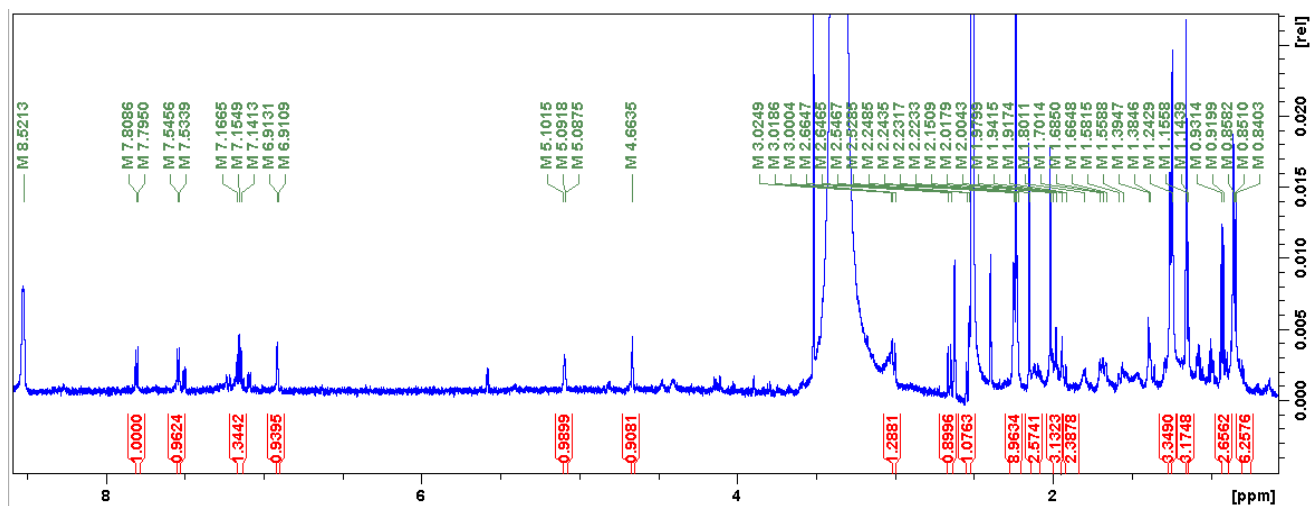

Figure S25. <sup>1</sup>H NMR spectrum of Deoxycitrinadin A (7) (600.17 MHz, DMSO).

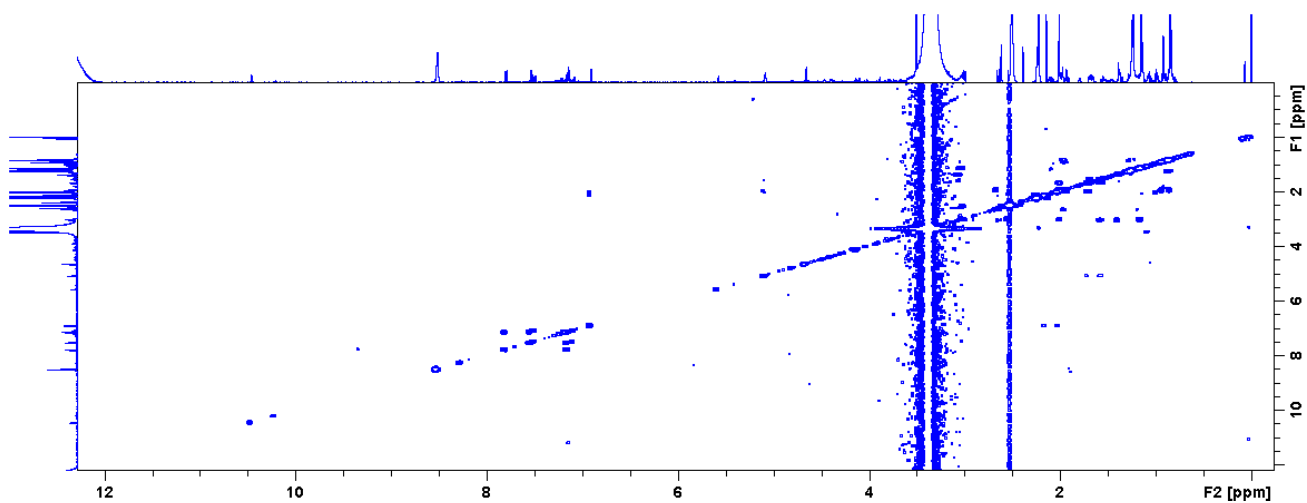

Figure S25. COSY NMR spectrum of Deoxycitrinadin A (7) (600.17 MHz, DMSO).

**Table S1.**  $^1\text{H}$  NMR data and  $^1\text{H}$ - $^1\text{H}$  correlations in COSY for **7** (600 MHz, DMSO) and comparison with the literature ( $\delta$  in ppm,  $J$  in Hz).

**7**

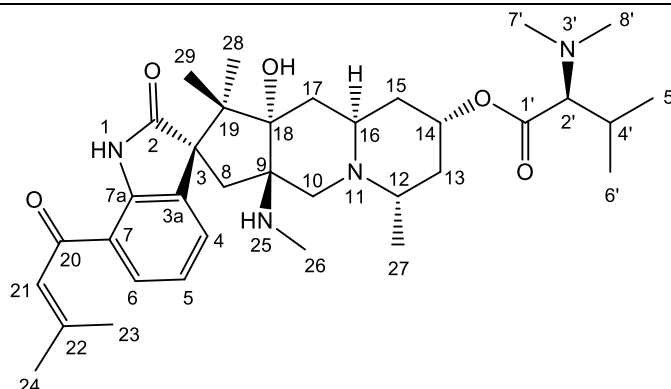

| Position | $^1\text{H}$ $\delta$ (m, $J$ ) | $^1\text{H}$ $\delta$ (m, $J$ ) <sup>1</sup> | COSY             |
|----------|---------------------------------|----------------------------------------------|------------------|
| 1        | 8.52 (s)                        | 9.77 (s)                                     |                  |
| 4        | 7.54 (d, 7.0)                   | 7.57 (d, 7.2)                                | H-5              |
| 5        | 7.15 (t, 7.0)                   | 7.06 (dd, 7.8, 7.2)                          | H-4, H-6         |
| 6        | 7.79 (d, 8.1)                   | 7.67 (dd, 7.8, 0.6)                          | H-5              |
| 8        | 1.98, 1.94 (ABq, 11.5)          | 2.08, 2.04 (ABq, 14.4)                       |                  |
| 10       | 3.00 (d, 10.9)                  | 3.15 (d, 10.8)                               |                  |
| 10       | 2.53 (d, 10.9)                  | 2.54 (d, 10.8)                               |                  |
| 12       | 3.03 – 2.99 (m)                 | 3.01 (quin, 6.6)                             | H-27, H-13       |
| 13       | 1.58 – 1.55 (m)                 | 1.50 – 1.45 (m)                              | H-12, H-14       |
| 13       | 2.03 – 1.99 (m)                 | 2.04 – 1.98 (comp)                           |                  |
| 14       | 5.10 – 5.08 (m)                 | 5.19 – 5.20 (m)                              | H-13, H-15       |
| 15       | 1.70 – 1.66 (m)                 | 1.80 – 1.76 (comp)                           | H-14, H-16       |
| 15       | 1.81 – 1.79 (m)                 | 1.80 – 1.76 (comp)                           |                  |
| 16       | 3.18 – 3.17 (m)                 | 3.20 – 3.14 (m)                              | H-15, H-17       |
| 17       | 1.39 – 1.38 (m)                 | 1.36 – 1.31 (comp)                           | H-16             |
| 17       | 1.58 – 1.55 (m)                 | 1.53 (dd, 13.2, 4.2)                         |                  |
| 18-OH    | 4.66 (s)                        | 4.70 (d, 2.4)                                |                  |
| 21       | 6.91 – 6.90 (m)                 | 6.75 – 6.74 (m)                              | H-24, H-23       |
| 23       | 2.15 (s)                        | 2.17 (d, 1.2)                                | H-21             |
| 24       | 2.01 (s)                        | 2.01 (d, 1.2)                                | H-21             |
| 26       | 2.24 – 2.23 (m)                 | 2.28 (s)                                     |                  |
| 27       | 1.15 (d, 7.1)                   | 1.19 (d, 7.2)                                | H-12             |
| 28       | 0.85 (s)                        | 0.96 (s)                                     |                  |
| 29       | 1.24 (s)                        | 1.36 – 1.31 (comp)                           |                  |
| 2'       | 2.65 (d, 10.9)                  | 2.68 (d, 10.8)                               | H-4'             |
| 4'       | 1.95 – 1.93 (m)                 | 2.04 – 1.98 (comp)                           | H-2', H-5', H-6' |
| 5'       | 0.92 (d, 6.9)                   | 0.95 (d, 6.6)                                | 4'               |
| 6'       | 0.85 (d, 6.4)                   | 0.88 (d, 6.6)                                | 4'               |
| 7'       | 2.23 (s)                        | 2.29 (s)                                     |                  |
| 8'       | 2.23 (s)                        | 2.29 (s)                                     |                  |

<sup>1</sup> Bian, Z., Marvin, C. C., Martin, S. F. Enantioselective Total Synthesis of (-)-Citridin A and Revision of Its Stereochemical Structure. *J Am Chem Soc* **135**, 10886-10889, <https://doi.org/10.1021/ja405547f> (2013).

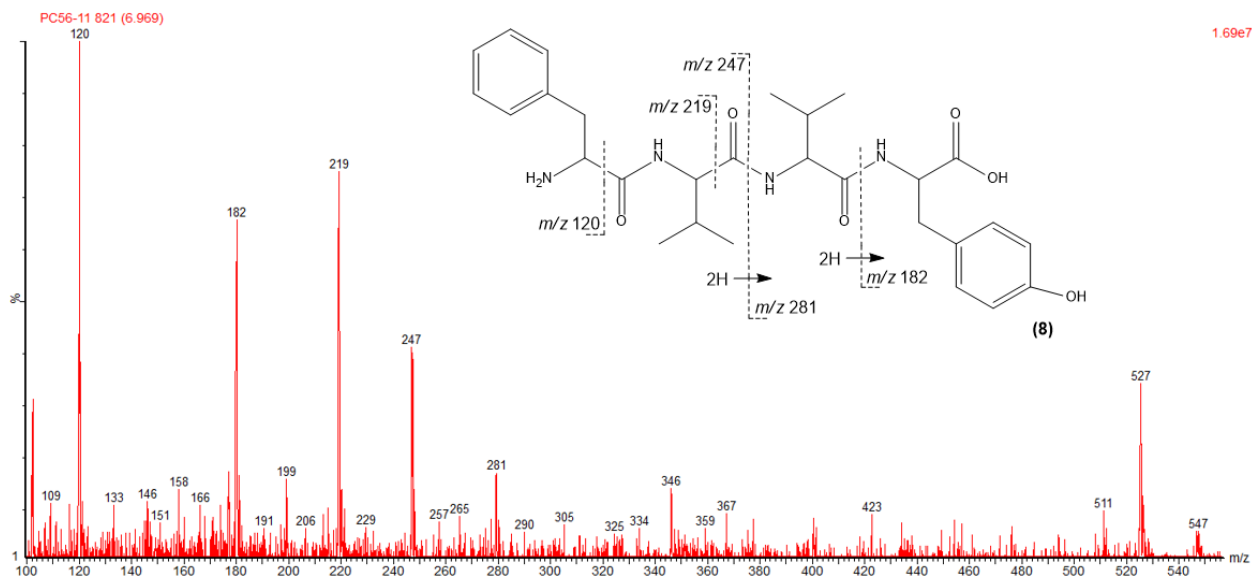

Figure S27. MS/MS spectrum of Tyr-Val-Val-Phe (8).

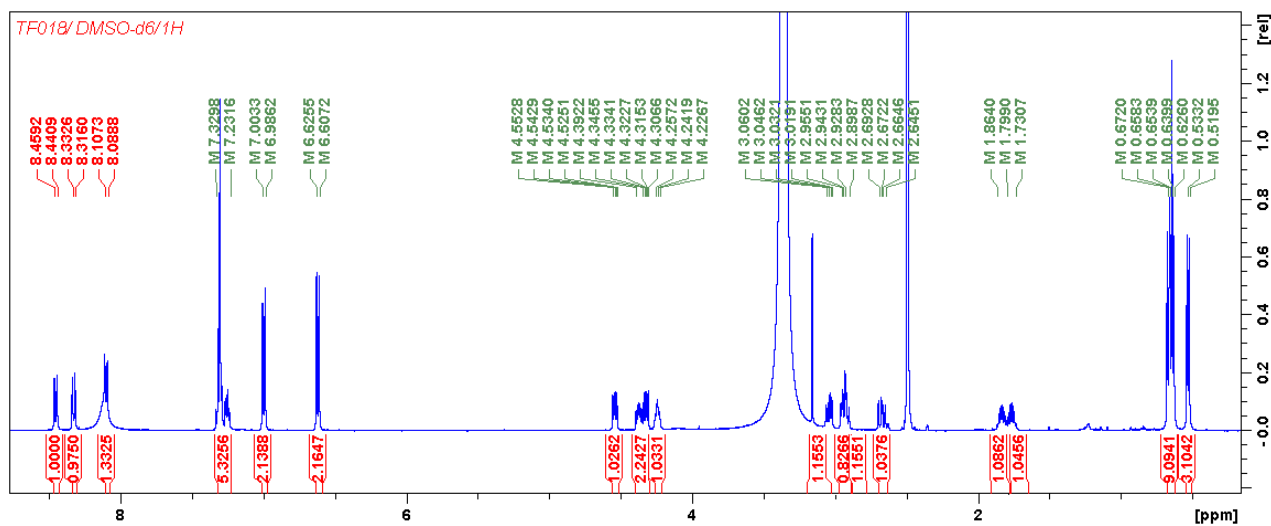

Figure S28.  $^1\text{H}$  NMR spectrum of Tyr-Val-Val-Phe (8) (500.13 MHz, DMSO).

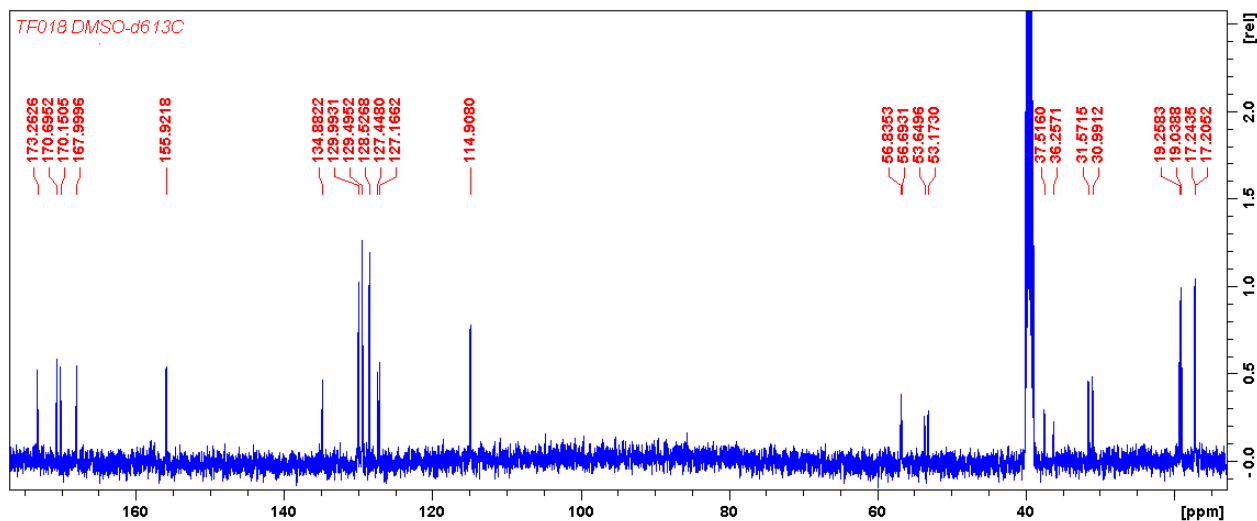

Figure S29.  $^{13}\text{C}$  NMR spectrum of Tyr-Val-Val-Phe (8) (500.13 MHz, DMSO).

**Table S2.**  $^1\text{H}$  and  $^{13}\text{C}$  NMR data for **8** (500 MHz, DMSO) ( $\delta$  in ppm,  $J$  in Hz).

| <b>8</b>  |                                                                  |                          |
|-----------|------------------------------------------------------------------|--------------------------|
|           |                                                                  |                          |
| Position  | $^1\text{H}$ $\delta$ (m, $J$ )                                  | $^{13}\text{C}$ $\delta$ |
| Phe       |                                                                  |                          |
| 1         | -                                                                | 160.0                    |
| 2         | 4.24 ( <i>t</i> , $J = 7.6$ )                                    | 53.2                     |
| 3         | 3.04 ( <i>dd</i> , $J = 14.0, 7.0$ )<br>2.89 – 2.95 ( <i>m</i> ) | 37.5                     |
| 4         | -                                                                | 134.9                    |
| 5,9       | 7.23 – 7.33 ( <i>m</i> )                                         | 129.5                    |
| 6,8       | 7.23 – 7.33 ( <i>m</i> )                                         | 127.4                    |
| 7         | 7.23 – 7.33 ( <i>m</i> )                                         | 127.2                    |
| Val       |                                                                  |                          |
| 1'        | -                                                                | 170.7                    |
| 2'        | 4.32 ( <i>dd</i> , $J = 9.4, 5.7$ )                              | 56.8                     |
| 3'        | 1.80 – 1.86 ( <i>m</i> )                                         | 31.6                     |
| 4'        | 0.67 ( <i>d</i> , $J = 7.0$ )                                    | 19.0                     |
| 5'        | 0.52 ( <i>d</i> , $J = 6.8$ )                                    | 17.2                     |
| NH        | 8.32 ( <i>d</i> , $J = 8.3$ )                                    | -                        |
| Val       |                                                                  |                          |
| 1''       | -                                                                | 170.1                    |
| 2''       | 4.54 ( <i>dd</i> , $J = 9.4, 5.0$ )                              | 56.7                     |
| 3''       | 1.73 – 1.79 ( <i>m</i> )                                         | 31.0                     |
| 4''       | 0.66 ( <i>d</i> , $J = 6.8$ )                                    | 19.2                     |
| 5''       | 0.63 ( <i>d</i> , $J = 6.9$ )                                    | 17.2                     |
| NH        | 8.45 ( <i>d</i> , $J = 9.1$ )                                    | -                        |
| Tyr       |                                                                  |                          |
| 1'''      | -                                                                | 173.3                    |
| 2'''      | 4.34 – 4.39 ( <i>m</i> )                                         | 53.4                     |
| 3'''      | 2.89 – 2.95 ( <i>m</i> )<br>2.66 ( <i>dd</i> , $J = 14.0, 9.7$ ) | 36.2                     |
| 4'''      | -                                                                | 128.5                    |
| 5''',9''' | 6.99 ( <i>d</i> , $J = 8.5$ )                                    | 130.0                    |
| 6''',8''' | 6.61 ( <i>d</i> , $J = 9.1$ )                                    | 114.9                    |
| 7'''      | -                                                                | 155.9                    |
| NH        | 8.10 ( <i>d</i> , $J = 9.2$ )                                    | -                        |

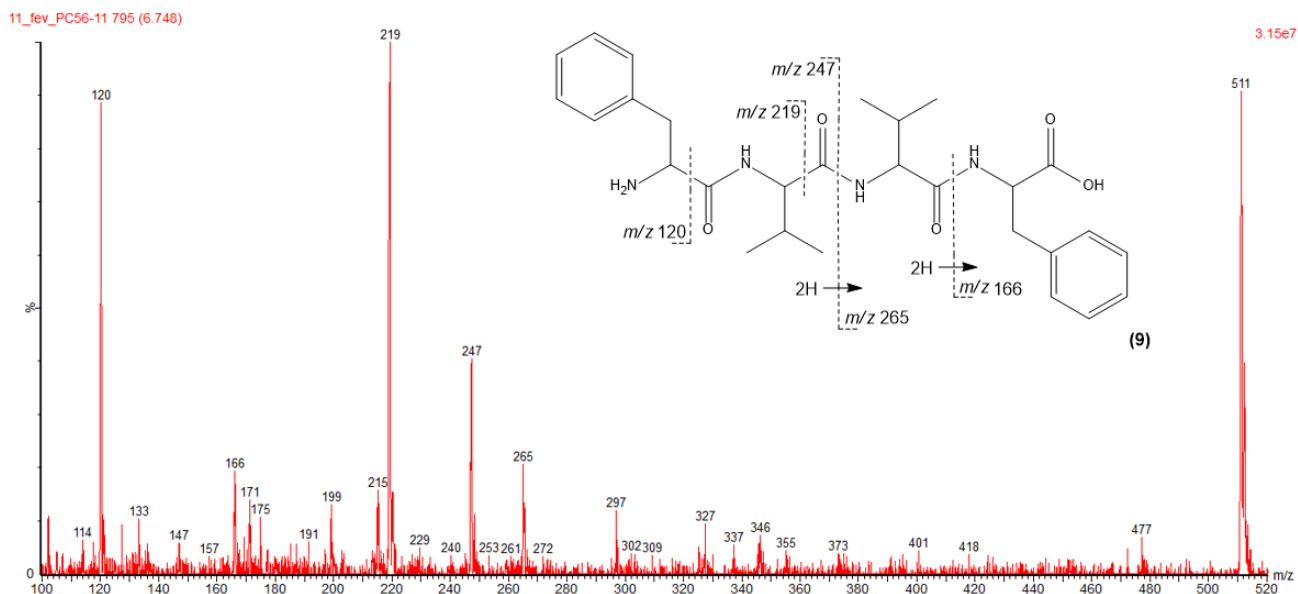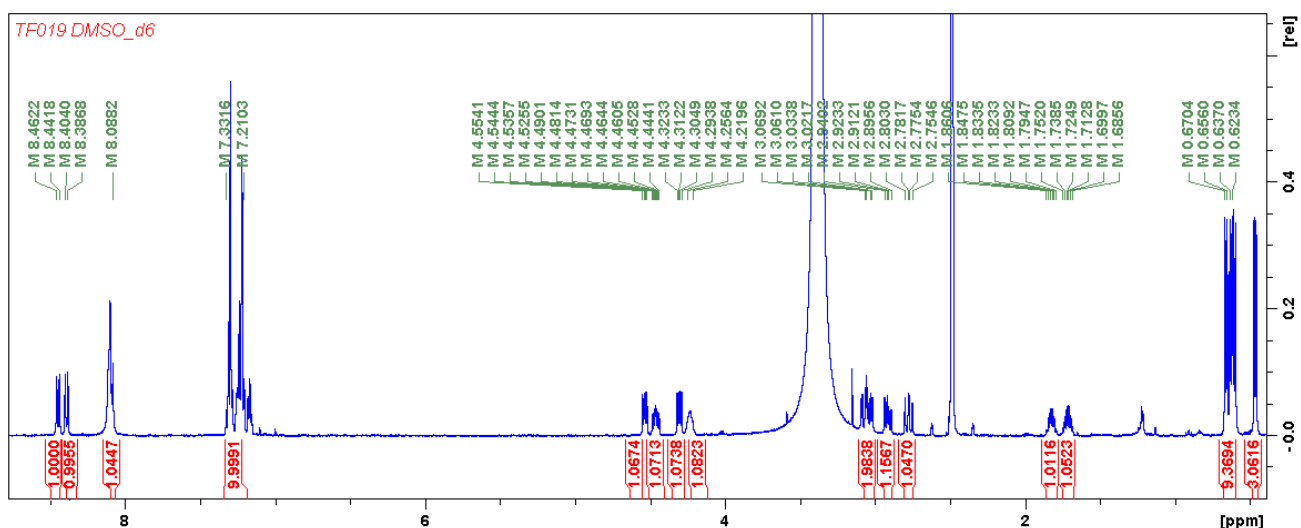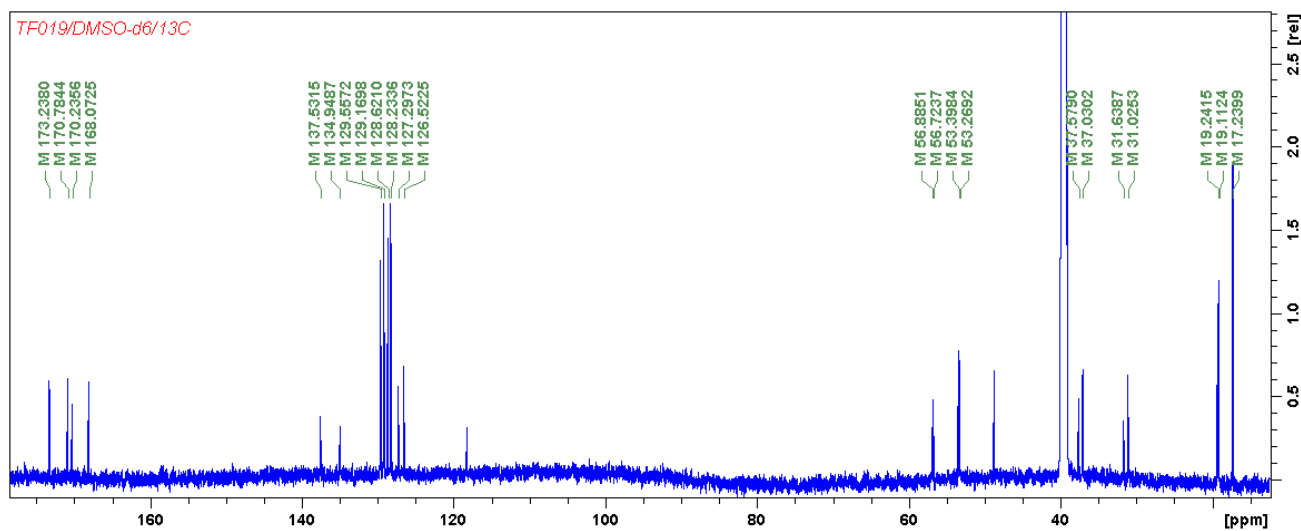

**Table S3.**  $^1\text{H}$  and  $^{13}\text{C}$  NMR data for **9** (500 MHz, DMSO) ( $\delta$  in ppm,  $J$  in Hz).

| <b>9</b>   |                                                          |                          |
|------------|----------------------------------------------------------|--------------------------|
|            |                                                          |                          |
| Position   | $^1\text{H}$ $\delta$ (m, $J$ )                          | $^{13}\text{C}$ $\delta$ |
| Phe        |                                                          |                          |
| 1          | -                                                        | 168.1                    |
| 2          | 4.21 – 4.25 (m)                                          | 53.3                     |
| 3          | 3.04 (dd, $J$ = 6.1, 13.7)<br>2.77 ( $J$ = 10.7, 13.8)   | 37.0                     |
| 4          | -                                                        | 134.9                    |
| 5,9        | 7.21 – 7.33 (m)                                          | 129.2                    |
| 6, 8       | 7.21 – 7.33 (m)                                          | 128.6                    |
| 7          | 7.21 – 7.33 (m)                                          | 127.3                    |
| Val        |                                                          |                          |
| 1'         | -                                                        | 170.2                    |
| 2'         | 4.31 (dd, $J$ = 5.5, 9.2)                                | 56.7                     |
| 3'         | 1.71 (m)                                                 | 31.0                     |
| 4'         | 0.63 (d, $J$ = 6.8)                                      | 19.1                     |
| 5'         | 0.60 (d, $J$ = 6.8)                                      | 19.2                     |
| NH         | 8.45 (d, $J$ = 10.2)                                     | -                        |
| Val        |                                                          |                          |
| 1''        | -                                                        | 170.7                    |
| 2''        | 4.54 (dd, $J$ = 4.8, 9.2)                                | 56.9                     |
| 3''        | 1.82 (m)                                                 | 31.6                     |
| 4''        | 0.66 (d, $J$ = 7.2)                                      | 17.3                     |
| 5''        | 0.45 (d, $J$ = 7.0)                                      | 17.3                     |
| NH         | 8.39 (d, $J$ = 8.6)                                      | -                        |
| Phe        |                                                          |                          |
| 1'''       | -                                                        | 173.2                    |
| 2'''       | 4.47 (ddd, $J$ = 4.3, 8.5, 18.7)                         | 53.4                     |
| 3'''       | 3.07 (dd, $J$ = 4.4, 14.1)<br>2.91 (dd, $J$ = 8.5, 14.0) | 37.6                     |
| 4'''       | -                                                        | 137.5                    |
| 5''',9'''  | 7.21 – 7.33 (m)                                          | 129.5                    |
| 6''', 8''' | 7.21 – 7.33 (m)                                          | 128.2                    |
| 7'''       | 7.21 – 7.33 (m)                                          | 126.5                    |
| NH         | 8.01 (s)                                                 | -                        |

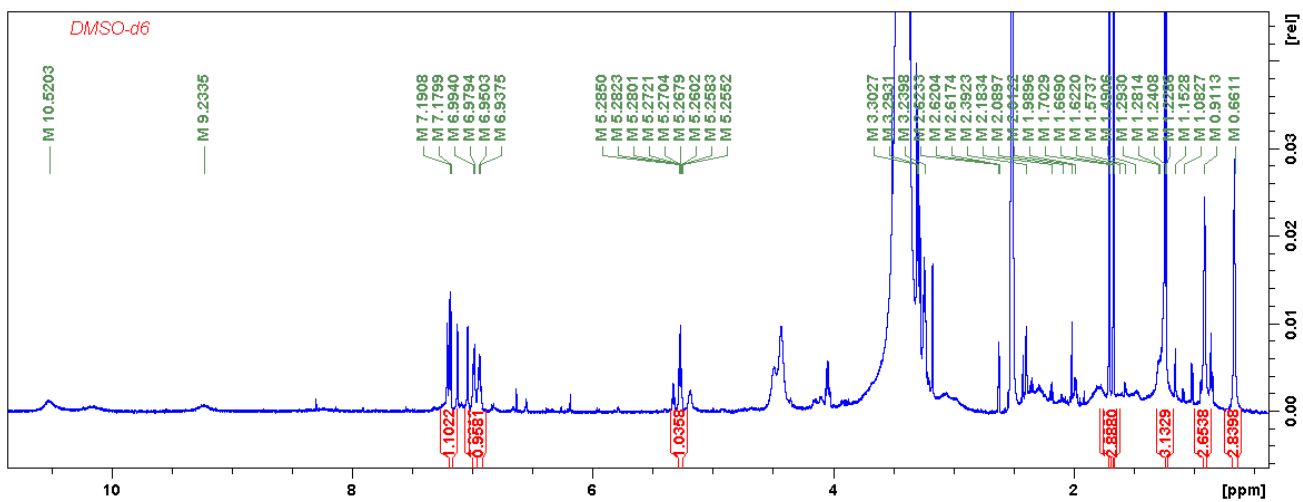

**Figure S33. <sup>1</sup>H NMR spectrum of chrysoygenamide A (10) (500.13 MHz, DMSO).**

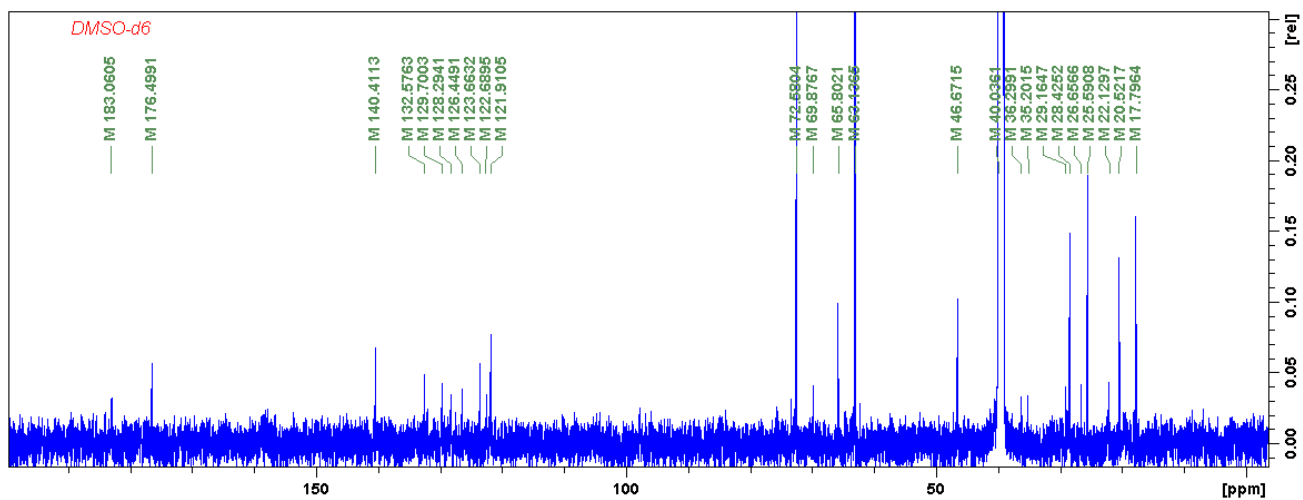

**Figure S34. <sup>13</sup>C NMR spectrum of chrysoygenamide A (10) (500.13 MHz, CDCl<sub>3</sub>).**

**Table S4.**  $^1\text{H}$  and  $^{13}\text{C}$  NMR data for **10** (500 MHz, DMSO) ( $\delta$  in ppm,  $J$  in Hz).

| <b>10</b> |                                     |                          |
|-----------|-------------------------------------|--------------------------|
| Position  | $^1\text{H}$ $\delta$ (m, $J$ )     | $^{13}\text{C}$ $\delta$ |
| 1-NH      | 10.52 (s)                           | -                        |
| 2         | -                                   | 183.1                    |
| 3         | -                                   | 72.6                     |
| 4         | 7.19 ( <i>d</i> , $J = 7.2$ )       | 126.4                    |
| 5         | 6.94 ( <i>d</i> , $J = 7.7$ )       | 121.9                    |
| 6         | 6.98 ( <i>d</i> , $J = 7.4$ )       | 128.3                    |
| 7         | -                                   | 123.6                    |
| 8         | -                                   | 140.4                    |
| 9         | -                                   | 129.7                    |
| 10        | -                                   | 40.0                     |
| 11        | -                                   | 69.9                     |
| 12a       | 3.30 ( <i>d</i> = 5.8)              | 63.1                     |
| 12b       | 2.39 ( <i>m</i> )                   | -                        |
| 13        | -                                   | 65.8                     |
| 14a       | 1.49 ( <i>m</i> )                   | 26.6                     |
| 14b       | 1.15 ( <i>m</i> )                   | -                        |
| 15a       | 2.09 ( <i>m</i> )                   | 29.2                     |
| 15b       | 10.52 (s)                           | -                        |
| 16a       | 1.57 ( <i>m</i> )                   | 35.2                     |
| 16b       | 1.08 ( <i>m</i> )                   | -                        |
| 17        | 1.99 ( <i>m</i> )                   | 65.8                     |
| 18        | -                                   | 176.5                    |
| 19-NH     | 9.23 (s)                            | -                        |
| 20a       | 1.62 ( <i>m</i> )                   | 36.3                     |
| 20b       | 1.28 ( <i>m</i> )                   | -                        |
| 21        | 2.62 ( <i>m</i> )                   | 46.7                     |
| 22        | -                                   | 46.7                     |
| 23        | 1.23 ( <i>d</i> , $J = 6.9$ )       | 22.1                     |
| 24        | 0.66 (s)                            | 20.5                     |
| 25        | 0.91 (s)                            | 20.5                     |
| 26        | 3.24 ( <i>m</i> )                   | 28.4                     |
| 27        | 5.27 ( <i>tt</i> , $J = 7.3, 1.3$ ) | 122.7                    |
| 28        | -                                   | 132.6                    |
| 29        | 1.70 (s)                            | 25.5                     |
| 30        | 1.67 (s)                            | 17.8                     |



#### S4. Antifungal assays

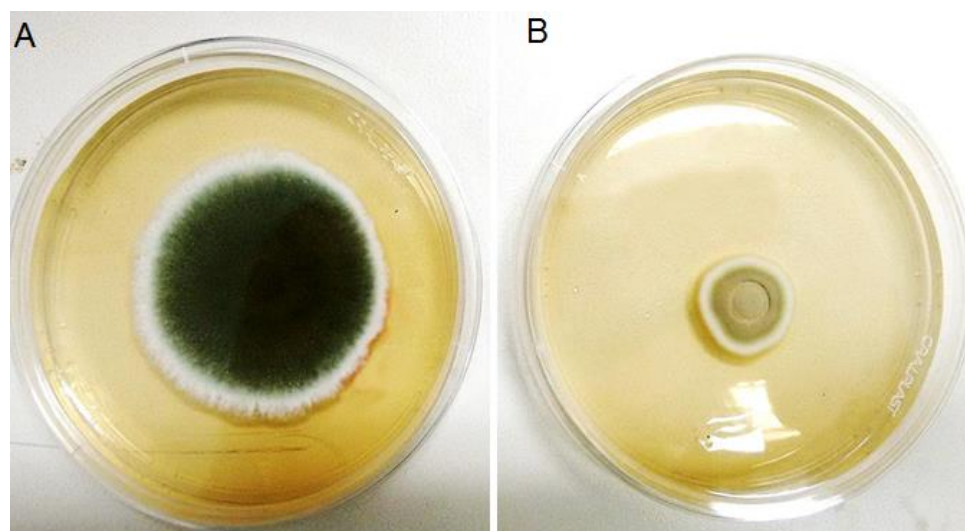

**Figure S35.** *P. digitatum* growing on (A) PDA and (B) PDA with 0.5 mg ml<sup>-1</sup> of the co-culture extract. *P. digitatum* exhibited reduction in radial growth of 67% in presence of *P. citrinum* metabolites

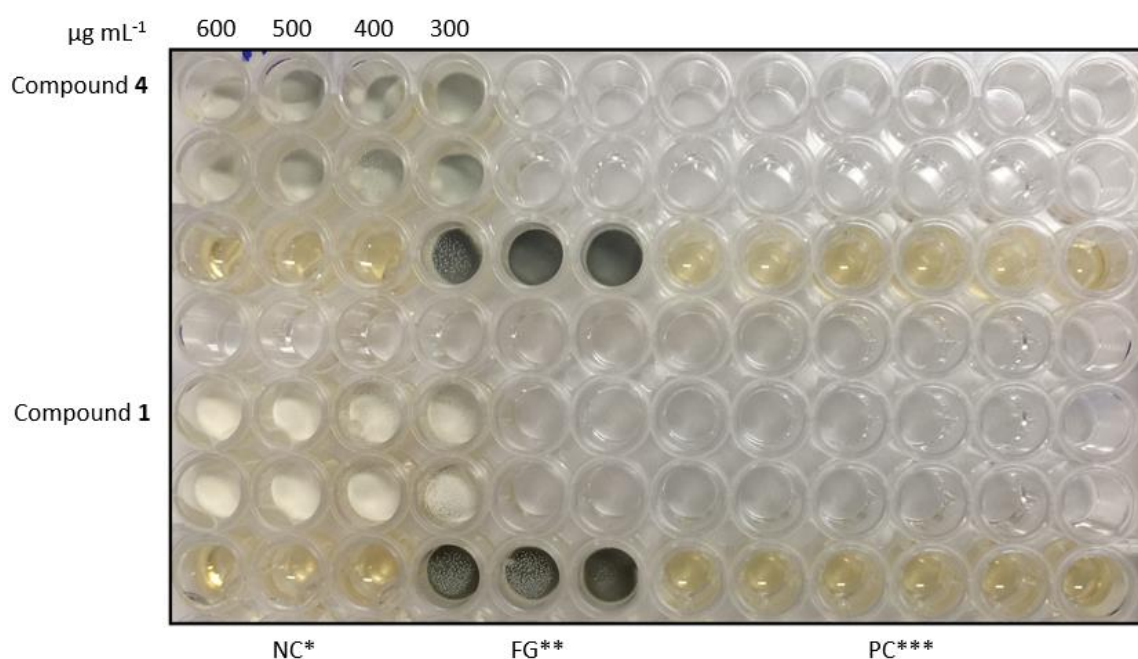

**Figure S36.** Microplate of MIC assay of tryptoquialanine A (**1**) and 15-dimethyl-2-epi-fumiquinazoline A (**4**) against *P. citrinum*. \*NC is the negative control (no inoculation). \*\*FG is the fungal control in YES media and 5% methanol. \*\*\*PC is the positive control (50 µg mL<sup>-1</sup> of itraconazole).

## S5. Confocal Laser Scanning Microscopy

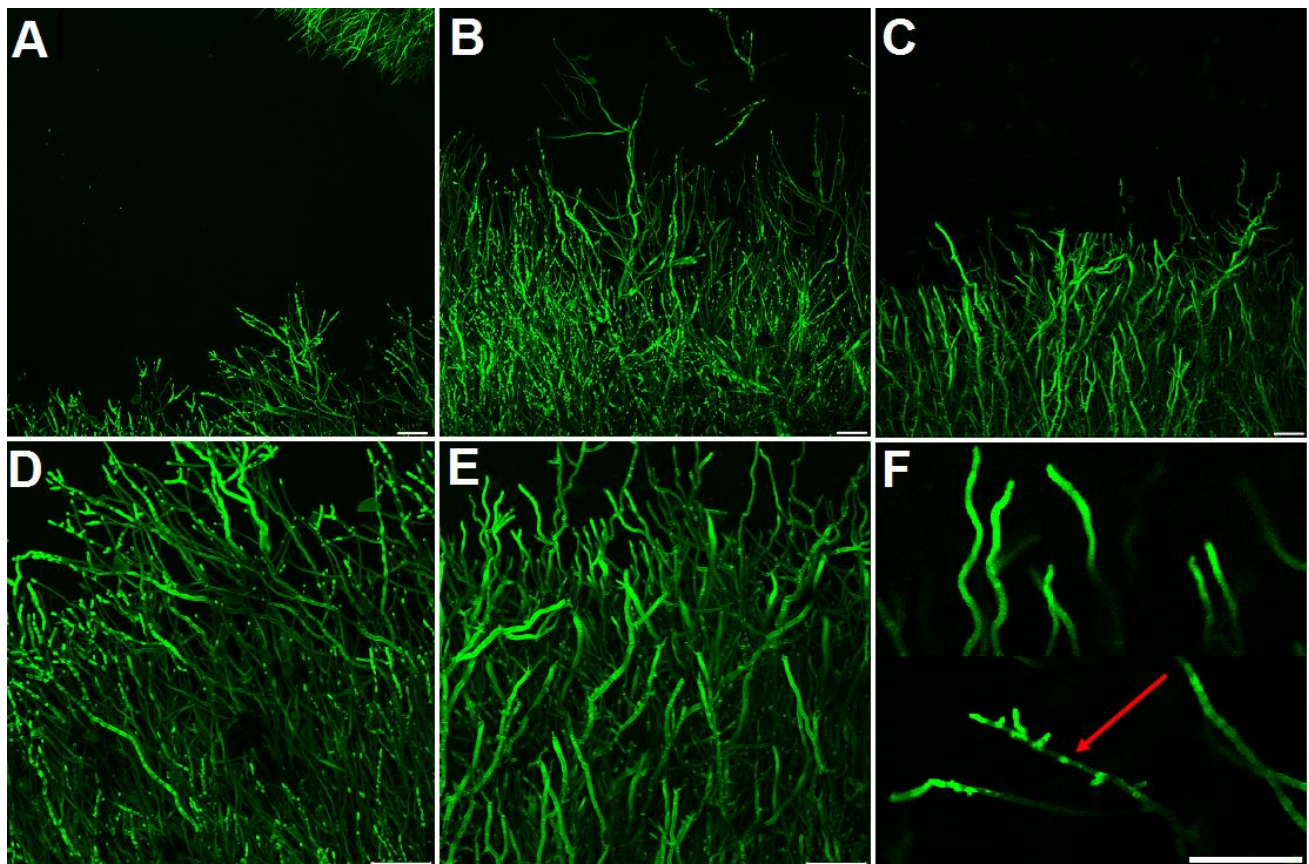

**Figure S37.** Confocal laser scanning microscopy of Congo Red-stained co-culture of *P. digitatum* and *P. citrinum*. (A) Interface zone between PD (below) and PC (above). PD hyphae: (B) sample and (C) control. Zoom in: (D) PD sample and (E) PD control. (F) Comparison between PD hyphae in control (above) and in sample (below): patches of Congo Red indicates a defective fungal cell wall. Bars = 5.0  $\mu\text{m}$
